# Supplementary material for: PheGWAS: a new dimension to visualize GWAS across multiple phenotypes
Source: PubMed Central journal article supplement (PMC7178436; doi:10.1093/bioinformatics/btz944), 2019-12-20
Supplement: btz944_supplementary_data.pdf [file btz944_supplementary_data.pdf]

**TABLES:**

**Supplementary Table 1a: Comparative analysis loci identified by GLGC and PheGWAS results for association of loci with single traits**

| Nearest Gene    | SNP ID     | Chromosome | Position MB | Trait | In PheGWAS | Gene Match | Identifying GLGC SNP's |
|-----------------|------------|------------|-------------|-------|------------|------------|------------------------|
| <i>EVIS</i>     | rs7515577  | 1          | 93.01       | TC    | DETECTED   | M          | B                      |
| <i>ZNF648</i>   | rs1689800  | 1          | 182.17      | HDL   | DETECTED   | NM         | B                      |
| <i>PABPC4</i>   | rs4660293  | 1          | 40.03       | HDL   | DETECTED   | M          | A                      |
| <i>ASAP3</i>    | rs1077514  | 1          | 23.77       | TC    | DETECTED   | M          | A                      |
| <i>ANXA9</i>    | rs267733   | 1          | 150.96      | LDL   | DETECTED   | M          | A                      |
| <i>HRNAD1</i>   | rs12145743 | 1          | 156.70      | HDL   | DETECTED   | M          | A                      |
| <i>C1orf220</i> | rs4650994  | 1          | 178.52      | HDL   | DETECTED   | M          | A                      |
| <i>RAB3GAP1</i> | rs7570971  | 2          | 135.84      | TC    | DETECTED   | M          | B                      |
| <i>COBLL1</i>   | rs12328675 | 2          | 165.54      | HDL   | DETECTED   | M          | B                      |
| <i>EHBP1</i>    | rs2710642  | 2          | 63.15       | LDL   | DETECTED   | M          | A                      |
| <i>ABCB11</i>   | rs2287623  | 2          | 169.83      | TC    | DETECTED   | M          | A                      |
| <i>FAM117B</i>  | rs11694172 | 2          | 203.53      | TC    | DETECTED   | M          | A                      |
| <i>CPS1</i>     | rs1047891  | 2          | 211.54      | HDL   | DETECTED   | M          | A                      |
| <i>FN1</i>      | rs1250229  | 2          | 216.30      | LDL   | DETECTED   | M          | A                      |
| <i>RAF1</i>     | rs2290159  | 3          | 12.63       | TC    | DETECTED   | NM         | C (level 3)            |
| <i>MSL2L1</i>   | rs645040   | 3          | 135.93      | TG    | DETECTED   | M          | A                      |
| <i>ATG7</i>     | rs2606736  | 3          | 11.40       | HDL   | DETECTED   | M          | A                      |
| <i>SETD2</i>    | rs2290547  | 3          | 47.06       | HDL   | DETECTED   | M          | A                      |
| <i>RBM5</i>     | rs2013208  | 3          | 50.13       | HDL   | DETECTED   | M          | A                      |
| <i>STAB1</i>    | rs13326165 | 3          | 52.53       | HDL   | DETECTED   | M          | A                      |
| <i>PXK</i>      | rs13315871 | 3          | 58.38       | TC    | DETECTED   | M          | A                      |
| <i>GSK3B</i>    | rs6805251  | 3          | 119.56      | HDL   | DETECTED   | M          | A                      |
| <i>KLHL8</i>    | rs442177   | 4          | 88.03       | TG    | DETECTED   | NM         | A                      |
| <i>SLC39A8</i>  | rs13107325 | 4          | 103.19      | HDL   | DETECTED   | M          | A                      |
| <i>C4orf52</i>  | rs10019888 | 4          | 26.06       | HDL   | DETECTED   | NA         | A                      |
| <i>FAM13A</i>   | rs3822072  | 4          | 89.74       | HDL   | DETECTED   | M          | A                      |
| <i>ADH5</i>     | rs2602836  | 4          | 100.01      | HDL   | DETECTED   | M          | A                      |
| <i>ARL15</i>    | rs6450176  | 5          | 53.30       | HDL   | DETECTED   | M          | A                      |
| <i>MAP3K1</i>   | rs9686661  | 5          | 55.86       | TG    | DETECTED   | NM         | A                      |
| <i>CITED2</i>   | rs605066   | 6          | 139.83      | HDL   | DETECTED   | NM         | B                      |
| <i>C6orf106</i> | rs2814982  | 6          | 34.55       | TC    | DETECTED   | M          | A                      |
| <i>KCNK17</i>   | rs2758886  | 6          | 39.25       | TC    | DETECTED   | M          | A                      |
| <i>HBS1L</i>    | rs9376090  | 6          | 135.41      | TC    | DETECTED   | M          | A                      |
| <i>TYW1B</i>    | rs13238203 | 7          | 72.13       | TG    | DETECTED   | NM         | B                      |
| <i>KLFL14</i>   | rs4731702  | 7          | 130.43      | HDL   | DETECTED   | M          | B                      |
| <i>GPR146</i>   | rs1997243  | 7          | 1.08        | TC    | DETECTED   | M          | A                      |
| <i>DAGLB</i>    | rs702485   | 7          | 6.45        | HDL   | DETECTED   | M          | A                      |
| <i>SNX13</i>    | rs4142995  | 7          | 17.92       | HDL   | DETECTED   | M          | A                      |
| <i>IKZF1</i>    | rs4917014  | 7          | 50.31       | HDL   | DETECTED   | M          | A                      |
| <i>MET</i>      | rs38855    | 7          | 116.36      | TG    | DETECTED   | M          | A                      |
| <i>TMEM176A</i> | rs17173637 | 7          | 150.53      | HDL   | DETECTED   | M          | A                      |
| <i>PINX1</i>    | rs11776767 | 8          | 10.68       | TG    | DETECTED   | M          | B                      |
| <i>TRPS1</i>    | rs2293889  | 8          | 116.60      | HDL   | DETECTED   | M          | A                      |
| <i>JMJD1C</i>   | rs10761731 | 10         | 65.03       | TG    | DETECTED   | M          | B                      |
| <i>CYP26A1</i>  | rs2068888  | 10         | 94.84       | TG    | DETECTED   | M          | A                      |
| <i>AKR1C4</i>   | rs1832007  | 10         | 5.25        | TG    | DETECTED   | M          | A                      |
| <i>VIM</i>      | rs10904908 | 10         | 17.26       | TC    | DETECTED   | M          | A                      |
| <i>SPTY2D1</i>  | rs10128711 | 11         | 18.63       | TC    | DETECTED   | M          | B                      |
| <i>AMPD3</i>    | rs2923084  | 11         | 10.39       | HDL   | DETECTED   | M          | A                      |
| <i>LRP4</i>     | rs3136441  | 11         | 46.74       | HDL   | DETECTED   | NM         | A                      |
| <i>OR4C46</i>   | rs11246602 | 11         | 51.51       | HDL   | DETECTED   | M          | A                      |
| <i>PCNXL3</i>   | rs12801636 | 11         | 65.39       | HDL   | DETECTED   | M          | A                      |
| <i>MOGAT2</i>   | rs499974   | 11         | 75.46       | HDL   | DETECTED   | M          | A                      |
| <i>PHLDB1</i>   | rs11603023 | 11         | 118.49      | TC    | DETECTED   | M          | A                      |
| <i>PDE3A</i>    | rs7134375  | 12         | 20.47       | HDL   | DETECTED   | NA         | B                      |
| <i>MVK</i>      | rs7134594  | 12         | 110.00      | HDL   | DETECTED   | M          | B                      |
| <i>SBNO1</i>    | rs4759375  | 12         | 123.80      | HDL   | DETECTED   | M          | C (level 1)            |
| <i>SCARB1</i>   | rs838880   | 12         | 125.26      | HDL   | DETECTED   | M          | B                      |
| <i>PHC1</i>     | rs4883201  | 12         | 9.08        | TC    | DETECTED   | M          | A                      |
| <i>BRCA2</i>    | rs4942486  | 13         | 32.95       | LDL   | DETECTED   | M          | A                      |
| <i>NYNRIN</i>   | rs8017377  | 14         | 24.88       | LDL   | DETECTED   | M          | A                      |
| <i>ZBTB42</i>   | rs4983559  | 14         | 105.28      | HDL   | DETECTED   | M          | A                      |
| <i>FRMD5</i>    | rs2929282  | 15         | 44.25       | TG    | DETECTED   | M          | B                      |
| <i>CAPN3</i>    | rs2412710  | 15         | 42.68       | TG    | DETECTED   | M          | A                      |
| <i>LACTB</i>    | rs2652834  | 15         | 63.40       | HDL   | DETECTED   | M          | A                      |
| <i>CTF1</i>     | rs11649653 | 16         | 30.92       | TG    | DETECTED   | M          | A                      |
| <i>LCAT</i>     | rs16942887 | 16         | 67.93       | HDL   | DETECTED   | M          | A                      |
| <i>CMIP</i>     | rs2925979  | 16         | 81.53       | HDL   | DETECTED   | M          | A                      |
| <i>PDXDC1</i>   | rs3198697  | 16         | 15.13       | TG    | DETECTED   | M          | A                      |
| <i>STARD3</i>   | rs11869286 | 17         | 37.81       | HDL   | DETECTED   | M          | B                      |
| <i>PGS1</i>     | rs4129767  | 17         | 76.40       | HDL   | DETECTED   | M          | B                      |
| <i>ABCA8</i>    | rs4148008  | 17         | 66.88       | HDL   | DETECTED   | M          | A                      |
| <i>MPP3</i>     | rs8077889  | 17         | 41.88       | TG    | DETECTED   | M          | A                      |
| <i>APOH</i>     | rs1801689  | 17         | 64.21       | LDL   | DETECTED   | M          | A                      |
| <i>MC4R</i>     | rs12967135 | 18         | 57.85       | HDL   | DETECTED   | NM         | B                      |
| <i>ANGPTL4</i>  | rs7255436  | 19         | 8.43        | HDL   | DETECTED   | M          | B                      |
| <i>FLJ36070</i> | rs492602   | 19         | 49.21       | TC    | DETECTED   | NM         | B                      |
| <i>LILRA3</i>   | rs386000   | 19         | 54.79       | HDL   | DETECTED   | M          | B                      |
| <i>ANGPTL8</i>  | rs737337   | 19         | 11.35       | HDL   | DETECTED   | NM         | A                      |
| <i>INSR</i>     | rs7248104  | 19         | 7.22        | TG    | DETECTED   | M          | A                      |
| <i>FPR3</i>     | rs17695224 | 19         | 52.32       | HDL   | DETECTED   | M          | A                      |
| <i>ERGIC3</i>   | rs2277862  | 20         | 34.15       | TC    | DETECTED   | M          | B                      |
| <i>SPTLC3</i>   | rs364585   | 20         | 12.96       | LDL   | DETECTED   | M          | A                      |
| <i>SNX5</i>     | rs2328223  | 20         | 17.85       | LDL   | DETECTED   | NM         | A                      |
| <i>UBE2L3</i>   | rs181362   | 22         | 21.93       | HDL   | DETECTED   | M          | C (level 1)            |
| <i>PLA2G6</i>   | rs5756931  | 22         | 38.55       | TG    | DETECTED   | M          | B                      |
| <i>MTMR3</i>    | rs5763662  | 22         | 30.38       | LDL   | DETECTED   | M          | A                      |
| <i>TOM1</i>     | rs138777   | 22         | 35.71       | TC    | DETECTED   | M          | A                      |

In this table, the columns in pheGWAS, gene match and SNP match corresponds to the PheGWAS results we obtained.

Match (M); if the gene symbol in a particular PheGWAS base pair interval segment is the same trait as reported in the GLGC

No Match (NM); if the gene is not identified by PheGWAS.

A- SNP identical with GLGC and PheGWAS

B – GLGC SNP in LD with SNP identified by PheGWAS

C – SNP identified by SNP thinning

**Supplementary Table 1b:** Summary of comparative analysis of loci identified by GLGC and PheGWAS results for association of loci with single traits

|                                |    |
|--------------------------------|----|
| Loci identified by GLGC        | 88 |
| Total Loci Detected by PheGWAS | 88 |
| Gene Match                     | 77 |
| Gene No Match                  | 11 |
| Gene not mapped                | 2  |
| SNP's in category A            | 63 |
| SNP's in category B            | 22 |
| SNP's in category C            | 3  |

**Supplementary Table 1c:** LD Score between SNPs in GLGC and PheGWAS in single traits

| Chromosome | Position MB | Trait | SNP Match | SNP ID     | SNP ID phegwas | d'   | r2     |
|------------|-------------|-------|-----------|------------|----------------|------|--------|
| 1          | 93.01       | TC    | M         | rs7515577  | rs1556562      | 1    | 1      |
| 1          | 182.17      | HDL   | M         | rs1689800  | rs1689797      | 0.99 | 0.89   |
| 2          | 135.84      | TC    | M         | rs7570971  | rs6730157      | 0.99 | 0.99   |
| 2          | 165.54      | HDL   | M         | rs12328675 | rs7607980      | 1    | 0.98   |
| 3          | 12.63       | TC    | NM        | rs2290159  | rs7616006      | 0.33 | 0.04   |
| 6          | 139.83      | HDL   | NM        | rs605066   | rs3861397      | 0.99 | 0.69   |
| 7          | 72.13       | TG    | NM        | rs13238203 | rs11974409     | 0.76 | 0.08   |
| 7          | 130.43      | HDL   | M         | rs4731702  | rs11765979     | 0.99 | 0.99   |
| 8          | 10.68       | TG    | NM        | rs11776767 | rs6995541      | 0.97 | 0.62   |
| 10         | 65.03       | TG    | M         | rs10761731 | rs10761762     | 1    | 0.8    |
| 11         | 18.63       | TC    | M         | rs10128711 | rs10832962     | 1    | 1      |
| 12         | 20.47       | HDL   | M         | rs7134375  | rs11045163     | 0.95 | 0.87   |
| 12         | 110.00      | HDL   | M         | rs7134594  | rs10850380     | 1    | 1      |
| 12         | 123.80      | HDL   | NM        | rs4759375  | rs2454722      | 0.2  | 0.2    |
| 12         | 125.26      | HDL   | M         | rs838880   | rs838876       | 0.94 | 0.84   |
| 15         | 44.25       | TG    | M         | rs2929282  | rs16948098     | 0.97 | 0.84   |
| 17         | 37.81       | HDL   | M         | rs11869286 | rs113612868    | 1    | 1      |
| 17         | 76.40       | HDL   | NM        | rs4129767  | rs4969178      | 0.94 | 0.57   |
| 18         | 57.85       | HDL   | M         | rs12967135 | rs6567160      | 1    | 1      |
| 19         | 8.43        | HDL   | M         | rs7255436  | rs2278236      | 1    | 0.99   |
| 19         | 49.21       | TC    | M         | rs492602   | rs516246       | 0.99 | 0.99   |
| 19         | 54.79       | HDL   | M         | rs386000   | rs103294       | 0.99 | 0.9    |
| 20         | 34.15       | TC    | NM        | rs2277862  | rs72664396     | 0.32 | 0.0002 |
| 22         | 21.93       | HDL   | NM        | rs181362   | rs113359481    | NA   | NA     |
| 22         | 38.55       | TG    | NM        | rs5756931  | rs3761445      | 0.73 | 0.49   |

**Supplementary Table 2a: Comparative analysis of loci identified by GLGC and PheGWAS results for association of loci with multiple traits**

| Nearest Gene     | SNP ID     | Chromosome | Position MB | Multiple Traits | In PheGWAS | Gene M | Identifying GLGC SNP's |
|------------------|------------|------------|-------------|-----------------|------------|--------|------------------------|
| <i>LDLRAP1</i>   | rs12027135 | 1          | 25.78       | TC,LDL          | DETECTED   | NM     | B                      |
| <i>PCSK9</i>     | rs2479409  | 1          | 55.50       | LDL,TC          | DETECTED   | M      | B                      |
| <i>ANGPTL3</i>   | rs2131925  | 1          | 63.03       | TG,LDL,TC       | DETECTED   | M      | B                      |
| <i>SORT1</i>     | rs629301   | 1          | 109.82      | LDL,TC          | DETECTED   | M      | B                      |
| <i>MOSC1</i>     | rs2642442  | 1          | 220.97      | TC,LDL          | DETECTED   | NM     | B                      |
| <i>GALNT2</i>    | rs4846914  | 1          | 230.30      | HDL,TG          | DETECTED   | M      | B                      |
| <i>IRF2BP2</i>   | rs514230   | 1          | 234.86      | TC,LDL          | DETECTED   | NM     | B                      |
| <i>PIGV</i>      | rs12748152 | 1          | 27.14       | HDL, LDL, TG    | DETECTED   | M      | A                      |
| <i>APOB</i>      | rs1367117  | 2          | 21.2600     | LDL,TC          | DETECTED   | M      | B                      |
| <i>GCKR</i>      | rs1260326  | 2          | 27.7300     | TG,TC           | DETECTED   | M      | B                      |
| <i>IRS1</i>      | rs2972146  | 2          | 227.1000    | HDL,TG          | DETECTED   | NA     | B                      |
| <i>INSIG2</i>    | rs10490626 | 2          | 118.84      | LDL, TCa        | DETECTED   | M      | B                      |
| <i>ABCG5/8</i>   | rs4299376  | 2          | 44.0700     | LDL,TC          | DETECTED   | M      | B                      |
| <i>LOC84931</i>  | rs2030746  | 2          | 121.31      | LDL, TC         | DETECTED   | NM     | A                      |
| <i>UGT1A1</i>    | rs11563251 | 2          | 234.68      | TC, LDL         | DETECTED   | M      | A                      |
| <i>DNAJC13</i>   | rs17404153 | 3          | 132.16      | LDL, HDLb       | DETECTED   | M      | C                      |
| <i>CMTM6</i>     | rs7640978  | 3          | 32.53       | LDL, TC         | DETECTED   | M      | A                      |
| <i>LRPAP1</i>    | rs6831256  | 4          | 3.47        | TG, TCa, LDLa   | DETECTED   | M      | A                      |
| <i>HMGCR</i>     | rs12916    | 5          | 74.6600     | TC,LDL          | DETECTED   | M      | A                      |
| <i>TMD4</i>      | rs6882076  | 5          | 156.3900    | TC,TG,LDL       | DETECTED   | M      | A                      |
| <i>CSNK1G3</i>   | rs4530754  | 5          | 122.86      | LDL, TC         | DETECTED   | M      | A                      |
| <i>LPA</i>       | rs1564348  | 6          | 160.5800    | LDL,TC          | DETECTED   | M      | B                      |
| <i>RSPO3</i>     | rs1936800  | 6          | 127.44      | HDL, TGa        | DETECTED   | M      | B                      |
| <i>HLA</i>       | rs3177928  | 6          | 32.4100     | TC,LDL          | DETECTED   | M      | B                      |
| <i>FRK</i>       | rs9488822  | 6          | 116.3100    | TC,LDL          | DETECTED   | M      | B                      |
| <i>MYLIP</i>     | rs3757354  | 6          | 16.1300     | LDL,TC          | DETECTED   | M      | A                      |
| <i>HFE</i>       | rs1800562  | 6          | 26.0900     | LDL,TC          | DETECTED   | M      | A                      |
| <i>VEGFA</i>     | rs998584   | 6          | 43.76       | TG, HDL         | DETECTED   | M      | A                      |
| <i>MIR148A</i>   | rs4722551  | 7          | 25.99       | LDL, TGc, TC    | DETECTED   | M      | B                      |
| <i>NPC1L1</i>    | rs2072183  | 7          | 44.5800     | TC,LDL          | DETECTED   | M      | B                      |
| <i>MLXIPL</i>    | rs17145738 | 7          | 72.9800     | TG,HDL          | DETECTED   | M      | B                      |
| <i>DNAH11</i>    | rs12670798 | 7          | 21.6100     | TC,LDL          | DETECTED   | M      | A                      |
| <i>PPP1R3B</i>   | rs9987289  | 8          | 9.1800      | HDL,TC,LDL      | DETECTED   | NM     | A                      |
| <i>LPL</i>       | rs12678919 | 8          | 19.8400     | TG,HDL          | DETECTED   | M      | B                      |
| <i>TRIB1</i>     | rs2954029  | 8          | 126.4900    | TG,TC,LDL,HDL   | DETECTED   | M      | B                      |
| <i>NAT2</i>      | rs1495741  | 8          | 18.2700     | TG,TC           | DETECTED   | M      | B                      |
| <i>CYP7A1</i>    | rs2081687  | 8          | 59.3900     | TC,LDL          | DETECTED   | M      | B                      |
| <i>PLEC1</i>     | rs11136341 | 8          | 145.0400    | LDL,TC          | DETECTED   | M      | B                      |
| <i>SOX17</i>     | rs10102164 | 8          | 55.42       | LDL, TC         | DETECTED   | M      | A                      |
| <i>TTC39B</i>    | rs581080   | 9          | 15.3100     | HDL,TC          | DETECTED   | M      | B                      |
| <i>ABO</i>       | rs9411489  | 9          | 136.1550    | LDL,TC          | DETECTED   | M      | B                      |
| <i>ABCA1</i>     | rs1883025  | 9          | 107.6600    | HDL,TC          | DETECTED   | M      | A                      |
| <i>LDLR</i>      | rs3780181  | 9          | 2.64        | TC, LDL         | DETECTED   | M      | A                      |
| <i>GPAM</i>      | rs2255141  | 10         | 113.9300    | TC,LDL          | DETECTED   | M      | B                      |
| <i>8-Mar</i>     | rs970548   | 10         | 46.01       | HDL, TC         | DETECTED   | M      | B                      |
| <i>APOA1</i>     | rs964184   | 11         | 116.6500    | TG,TC,HDL,LDL   | DETECTED   | M      | B                      |
| <i>ST3GAL4</i>   | rs11220462 | 11         | 126.2400    | LDL,TC          | DETECTED   | M      | B                      |
| <i>FADS1-2-3</i> | rs174546   | 11         | 61.5700     | TG,LDL,TC,HDL   | DETECTED   | M      | B                      |
| <i>UBASH3B</i>   | rs7941030  | 11         | 122.5200    | TC,HDL          | DETECTED   | M      | B                      |
| <i>LRP1</i>      | rs11613352 | 12         | 57.7900     | TG,HDL          | DETECTED   | NM     | B                      |
| <i>BRAP</i>      | rs11065987 | 12         | 112.0700    | TC,LDL          | DETECTED   | M      | B                      |
| <i>HNF1A</i>     | rs1169288  | 12         | 121.4200    | TC,LDL          | DETECTED   | M      | B                      |
| <i>ZNF664</i>    | rs4765127  | 12         | 124.4600    | HDL,TG          | DETECTED   | M      | B                      |
| <i>LIPC</i>      | rs1532085  | 15         | 58.6800     | HDL,TC,TG       | DETECTED   | M      | C (level 1)            |
| <i>FTO</i>       | rs1121980  | 16         | 53.81       | HDL, TGb        | DETECTED   | M      | C (level 1)            |
| <i>CETP</i>      | rs3764261  | 16         | 56.9900     | HDL,LDL,TC,TG   | DETECTED   | M      | B                      |
| <i>HPR</i>       | rs2000999  | 16         | 72.1100     | TC,LDL          | DETECTED   | M      | A                      |
| <i>OSBPL7</i>    | rs7206971  | 17         | 45.4300     | LDL,TC          | DETECTED   | NM     | B                      |
| <i>DLG4</i>      | rs314253   | 17         | 7.09        | TC, LDL         | DETECTED   | M      | A                      |
| <i>LIPG</i>      | rs7241918  | 18         | 47.1600     | HDL,TC          | DETECTED   | M      | B                      |
| <i>APOE</i>      | rs4420638  | 19         | 45.4200     | LDL,TC,HDL      | DETECTED   | M      | B                      |
| <i>LDLR</i>      | rs6511720  | 19         | 11.2000     | LDL,TC          | DETECTED   | M      | A                      |
| <i>CILP2</i>     | rs10401969 | 19         | 19.4100     | TC,TG,LDL       | DETECTED   | NM     | A                      |
| <i>PEPD</i>      | rs731839   | 19         | 33.9        | TG, HDL         | DETECTED   | M      | A                      |
| <i>MAFB</i>      | rs2902940  | 20         | 39.0900     | TC,LDL          | DETECTED   | NM     | C(level 5)             |
| <i>TOP1</i>      | rs6029526  | 20         | 39.6700     | LDL,TC          | DETECTED   | M      | B                      |
| <i>PLTP</i>      | rs6065906  | 20         | 44.5500     | HDL,TG          | DETECTED   | M      | B                      |
| <i>HNF4A</i>     | rs1800961  | 20         | 43.0400     | HDL,TC          | DETECTED   | M      | A                      |
| <i>PPARA</i>     | rs4253772  | 22         | 46.63       | TC, LDLa        | DETECTED   | M      | B                      |

In this table, the columns in pheGWAS, gene match and SNP match corresponds to the PheGWAS results we obtained.

Match (M); if the gene symbol in a particular PheGWAS base pair interval segment is the same trait as reported in the GLGC

No Match (NM); if the gene is not identified by PheGWAS.

A - SNP identical with GLGC and PheGWAS

B – GLGC SNP in LD with SNP identified by PheGWAS

C – SNP identified by SNP thinning

**Supplementary Table 2b:** Summary of comparative analysis of loci identified by GLGC and PheGWAS results for association of loci with multiple traits

|                                |    |
|--------------------------------|----|
| Loci identified by GLGC        | 69 |
| Total Loci Detected by PheGWAS | 69 |
| Gene Match                     | 59 |
| Gene No Match                  | 9  |
| Gene not mapped                | 1  |
| SNP's in Category A            | 21 |
| SNP's in Category B            | 44 |
| SNP's in Category C            | 4  |

**Supplementary Table 2c: LD Score between SNPs in GLGC and PheGWAS in multiple traits**

| Chromosome | Position MB | Multiple Traits | SNP Match | SNP ID     | SNP ID phegwas                        | d'               | r2                  |
|------------|-------------|-----------------|-----------|------------|---------------------------------------|------------------|---------------------|
| 1          | 25.78       | TC,LDL          | M         | rs12027135 | rs11802413,rs10903129                 | 1,1              | 0.98,0.98           |
| 1          | 55.50       | LDL,TC          | NM        | rs2479409  | rs11591147,rs11591147                 | 1,1              | 0.01,0.01           |
| 1          | 63.03       | TG,LDL,TC       | M         | rs2131925  | rs4587594,rs11485618,rs3850634        | 1,1,1            | 0.99,0.98           |
| 1          | 109.82      | LDL,TC          | M         | rs629301   | rs646776,rs646776                     | 1,1              | 0.99,0.99           |
| 1          | 220.97      | TC,LDL          | M         | rs2642442  | rs2642438,rs2642438                   | 0.92,0.92        | 0.80,0.80           |
| 1          | 230.30      | HDL,TG          | M         | rs4846914  | rs1321257                             | 0.99             | 0.95                |
| 1          | 234.86      | TC,LDL          | M         | rs514230   | rs558971,rs2587534                    | 0.97,0.97        | 0.94,0.93           |
| 2          | 21.2600     | LDL,TC          | PM        | rs1367117  | rs515135                              | 0.82             | 0.07                |
| 2          | 27.7300     | TG,TC           | M         | rs1260326  | rs780093,rs780093                     | 0.95,0.95        | 0.91,0.91           |
| 2          | 227.1000    | HDL,TG          | M         | rs2972146  | rs1515110                             | 0.94             | 0.88                |
| 2          | 118.84      | LDL, TCa        | M         | rs10490626 | rs17526895                            | 1                | 0.99                |
| 2          | 44.0700     | LDL,TC          | M         | rs4299376  | rs6544713,rs6544713                   | 0.99,0.99        | 0.97,0.97           |
| 3          | 132.16      | LDL, HDLb       | PM        | rs17404153 | NA                                    | NA               | NA                  |
| 6          | 160.5800    | LDL,TC          | M         | rs1564348  | rs11753995                            | 0.98             | 0.95                |
| 6          | 127.44      | HDL, TGa        | M         | rs1936800  | rs719726                              | 0.95             | 0.75                |
| 6          | 32.4100     | TC,LDL          | PM        | rs3177928  | rs9391858,rs10947332                  | 0.96,0.89        | 0.85,0.56           |
| 6          | 116.3100    | TC,LDL          | NM        | rs9488822  | rs11153594,rs6909746                  | 0.95,0.95        | 0.66,0.66           |
| 7          | 25.99       | LDL, TGc, TC    | PM        | rs4722551  | rs4719841                             | 0.88             | 0.1                 |
| 7          | 44.5800     | TC,LDL          | NM        | rs2072183  | rs2073547,rs2073547                   | 0.96,0.96        | 0.73,0.73           |
| 7          | 72.9800     | TG,HDL          | PM        | rs17145738 | rs11974409                            | 0.99             | 0.55                |
| 8          | 9.1800      | HDL,TC,LDL      | M         | rs9987289  | rs4240624                             | 1                | 1                   |
| 8          | 19.8400     | TG,HDL          | PM        | rs12678919 | rs13702                               | 0.99             | 0.31                |
| 8          | 126.4900    | TG,TC,LDL,HDL   | M         | rs2954029  | rs2954022,rs10808546                  | 1,0.98           | 0.98,0.88           |
| 8          | 18.2700     | TG,TC           | PM        | rs1495741  | rs4921914,rs1961456                   | 1,0.94           | 1,0.70              |
| 8          | 59.3900     | TC,LDL          | M         | rs2081687  | rs4738684,rs13277801                  | 0.97,0.97        | 0.93,0.94           |
| 8          | 145.0400    | LDL,TC          | M         | rs11136341 | rs7832643,rs7832643                   | 0.92,0.92        | 0.78,0.78           |
| 9          | 15.3100     | HDL,TC          | PM        | rs581080   | rs686030                              | 0.96             | 0.62                |
| 9          | 136.1550    | LDL,TC          | M         | rs9411489  | rs579459,rs579459                     | 1,1              | 0.83,0.83           |
| 10         | 113.9300    | TC,LDL          | M         | rs2255141  | rs2419604                             | 0.99             | 0.97                |
| 11         | 116.6500    | TG,TC,HDL,LDL   | PM        | rs964184   | rs10790162                            | 0.99             | 0.51                |
| 11         | 126.2400    | LDL,TC          | M         | rs11220462 | rs10893499                            | 1                | 0.99                |
| 11         | 61.5700     | TG,LDL,TC,HDL   | M         | rs174546   | rs174535,rs174583,rs1535,rs102275     | 1,0.99,0.99,1    | 0.97,0.92,0.97,0.93 |
| 11         | 122.5200    | TC,HDL          | M         | rs7941030  | rs7117842,rs7117842                   | 0.99,0.99        | 0.95,0.95           |
| 12         | 57.7900     | TG,HDL          | M         | rs11613352 | rs3741414                             | 1                | 0.99                |
| 12         | 112.0700    | TC,LDL          | M         | rs11065987 | rs653178,rs653178                     | 0.97,0.97        | 0.78,0.78           |
| 12         | 121.4200    | TC,LDL          | M         | rs1169288  | rs2244608                             | 0.99             | 0.96                |
| 12         | 124.4600    | HDL,TG          | M         | rs4765127  | rs7973683,rs11057408                  | 0.99,1           | 0.97,1              |
| 15         | 58.6800     | HDL,TC,TG       | NM        | rs1532085  | rs10468017,rs10468017,rs588136        | 0.98,0.98,0.001  | 0.67,0.67,0         |
| 16         | 53.81       | HDL, TGb        | PM        | rs1121980  | rs9930333                             | NA               | NA                  |
| 16         | 56.9900     | HDL,LDL,TC,TG   | PM        | rs3764261  | rs9989419,rs247616,rs247616,rs1800775 | 0.81,0.99,0.99,1 | 0.18,0.97,0.97,0.43 |
| 17         | 45.4300     | LDL,TC          | M         | rs7206971  | rs6504872,rs6504872                   | 1,1              | 1,1                 |
| 18         | 47.1600     | HDL,TC          | M         | rs7241918  | rs4939883,rs2156552                   | 0.99,0.98        | 0.92,0.94           |
| 19         | 45.4200     | LDL,TC,HDL      | NM        | rs4420638  | rs7254892,rs7412,rs2075650            | 0.84,0.92,0.72   | 0.01,0.01,0.31      |
| 20         | 39.0900     | TC,LDL          | NM        | rs2902940  | rs2235367,rs6065311                   | 0.02,0.02        | 0.0001,0.0001       |
| 20         | 39.6700     | LDL,TC          | PM        | rs6029526  | rs2235367,rs6065312                   | 0.99,1           | 0.96,0.22           |
| 20         | 44.5500     | HDL,TG          | PM        | rs6065906  | rs4465830,rs4810479                   | 0.99,1           | 0.99,0.63           |
| 22         | 46.63       | TC,LDLa         | M         | rs4253772  | rs4253776                             | 0.99             | 0.95                |

**Supplementary Table 3:** PheGWAS findings showcasing Chromosome Number, Marker Name, Associated Traits, Genes and the respective p-values for Chromosome 1

| Chr | Position group (Mb) | Marker Name                      | Associated Traits          | Genes                                                                                                                                                 | P-Values                      | -log10 (P-value)    |
|-----|---------------------|----------------------------------|----------------------------|-------------------------------------------------------------------------------------------------------------------------------------------------------|-------------------------------|---------------------|
| 1   | 23                  | rs1077514                        | TOTAL_CHOLESTROL           | ASAP3 RP4-654C18.1 TCEA3                                                                                                                              | 6.4e-09                       | 8.19                |
| 1   | 25                  | rs10903129 rs11802413            | LDL TOTAL_CHOLESTROL       | AL031284.1 RHCE RP3-469D22.1 TMEM57                                                                                                                   | 3.03e-17 1.576e-14            | 16.52 13.8          |
| 1   | 26                  | rs2229714                        | HDL                        | MIR1976 RN75L679P RPS6KA1 Y_RNA                                                                                                                       | 6.094e-09                     | 8.22                |
| 1   | 27                  | rs12748152 rs12748152 rs12748152 | HDL LDL TRIGS              | ARID1A PIGV RN75L165P RN75L501P ZDHHC18                                                                                                               | 9.737e-16 3.209e-12 1.1e-09   | 15.01 11.49 8.96    |
| 1   | 39                  | rs2296173 rs16837533             | HDL TRIGS                  | BMP8A KIAA0754 MACF1 RP11-416A14.1 RP11-420K8.1                                                                                                       | 2.803e-17 3.873e-08           | 16.55 7.41          |
| 1   | 40                  | rs4660293 rs17513135             | HDL TRIGS                  | BMP8A OXCT2P1 PABPC4 PPIEL RP11-69E11.4 RP11-69E11.8 SNORA55                                                                                          | 2.863e-18 1.633e-08           | 17.54 7.79          |
| 1   | 55                  | rs11591147 rs11591147            | LDL TOTAL_CHOLESTROL       | BSND PCSK9 RP11-12C17.2 TMEM61 USP24                                                                                                                  | 8.58e-143 8.827e-86           | 142.07 85.05        |
| 1   | 56                  | rs1206643                        | LDL                        | RP11-466L17.1 RP11-90C4.1                                                                                                                             | 1.063e-08                     | 7.97                |
| 1   | 62                  | rs1168013 rs1168032 rs1168013    | LDL TRIGS TOTAL_CHOLESTROL | DOCK7 RP11-293K19.1                                                                                                                                   | 5.713e-33 1.486e-80 1.544e-80 | 32.24 79.83 79.81   |
| 1   | 63                  | rs11485618 rs4587594 rs3850634   | LDL TRIGS TOTAL_CHOLESTROL | AL138847.1 ANGPL3 DOCK7 RPS-849H19.2 RP11-230B22.1                                                                                                    | 3.729e-33 3.503e-82 1.39e-81  | 32.43 81.46 80.86   |
| 1   | 92                  | rs4970712 rs6603981              | LDL TOTAL_CHOLESTROL       | EVIS GF11                                                                                                                                             | 2.458e-13 7.846e-15           | 12.61 14.11         |
| 1   | 93                  | rs12133576 rs1556562 rs1556562   | HDL LDL TOTAL_CHOLESTROL   | DR1 RP4-713B5.2 RP4-717I23.3 Y_RNA EVIS RP4-593M8.1                                                                                                   | 6.15e-11 4.558e-13 1.398e-14  | 10.21 12.34 13.85   |
| 1   | 109                 | rs12740374 rs646776 rs646776     | HDL LDL TOTAL_CHOLESTROL   | CELSR2 MYBPHL PSRC1 SARS SORT1                                                                                                                        | 1.687e-15 1.63e-272 4.77e-187 | 14.77 271.79 186.32 |
| 1   | 110                 | rs333947 rs650985 rs18076        | HDL LDL TOTAL_CHOLESTROL   | CSF1 RP11-195M16.1 RP11-195M16.3 AC00032.2 AMPD2 GNAT2 GSTM1 GSTM2 GSTM4 RPS-1160K1.1 RPS-1160K1.6 GNAI3 GPR61 MIR197 RNU6V RPS-1160K1.3 RPS-1160K1.8 | 3.166e-09 1.899e-15 5.058e-10 | 8.5 14.72 9.3       |
| 1   | 150                 | rs267733                         | LDL                        | ANXA9 CERS2 FAM63A PRUNE RNU6-884P RP11-316M1.12 RP11-316M1.3 SETDB1                                                                                  | 5.285e-09                     | 8.28                |
| 1   | 156                 | rs12145743                       | HDL                        | CRABP2 HDGF ISG20L2 MRP24 PRCC RP11-66D17.3 RP11-66D17.5 RRAD1                                                                                        | 1.803e-08                     | 7.74                |
| 1   | 178                 | rs4650994                        | HDL                        | C1ORF220 C1orf220 LINC00083 RNASSP69 TEX35                                                                                                            | 6.696e-09                     | 8.17                |
| 1   | 182                 | rs1689797                        | HDL                        | GS1-122H1.2 GS1-122H1.3                                                                                                                               | 2.852e-21                     | 20.54               |
| 1   | 220                 | rs2642438 rs2642438 rs2642438    | HDL LDL TOTAL_CHOLESTROL   | HLA-AS1 MARC1 MARC2 RNUGATAC35P RP11-295M18.2 RP11-295M18.6                                                                                           | 7.781e-14 7.318e-16 1.283e-18 | 13.11 15.14 17.89   |
| 1   | 221                 | rs2247213 rs11590084             | LDL TOTAL_CHOLESTROL       | HLA-AS1 HLX RP11-295M18.2 RNUGATAC35P RP11-295M18.6                                                                                                   | 1.412e-08 8.387e-08           | 7.85 7.08           |
| 1   | 230                 | rs4846914 rs1321257              | HDL TRIGS                  | GALNT2                                                                                                                                                | 3.513e-41 5.986e-31           | 40.45 30.22         |
| 1   | 234                 | rs2587534 rs558971               | LDL TOTAL_CHOLESTROL       | RP4-781K5.4 RP4-781K5.5 RP4-781K5.6 RP4-781K5.7 RP4-781K5.8                                                                                           | 8.055e-25 7.025e-28           | 24.09 27.15         |

**Supplementary Table 4:** PheGWAS findings showcasing Chromosome Number, Marker Name, Associated Traits, Genes and the respective p-values for Chromosome 2

| Chr | Position group (Mb) | Marker Name                          | Associated Traits              | Genes                                                                                                                            | P-Values                                | -log10 (P-value)         |
|-----|---------------------|--------------------------------------|--------------------------------|----------------------------------------------------------------------------------------------------------------------------------|-----------------------------------------|--------------------------|
| 2   | 20                  | rs11679386 rs11679386                | LDL TOTAL_CHOLESTROL           | C2orf43                                                                                                                          | 4.746e-14 2.226e-11                     | 13.32 10.65              |
| 2   | 21                  | rs676210 rs1367117 rs676210 rs515135 | HDL LDL TRIGS TOTAL_CHOLESTROL | APOB RP11-116D2.1                                                                                                                | 2.345e-54 9.48e-183 3.284e-71 6.38e-151 | 53.63 182.02 70.48 150.2 |
| 2   | 27                  | rs780093 rs1260326 rs780093          | LDL TRIGS TOTAL_CHOLESTROL     | AC109829.1 FNDC4 GCKR IFT172 RNU6-986P                                                                                           | 2.359e-08 2.29e-239 2.591e-42           | 7.63 238.64 41.59        |
| 2   | 28                  | rs13030345 rs13030345                | TRIGS TOTAL_CHOLESTROL         | AC110084.1 MRPL33 RBKS                                                                                                           | 1.019e-57 2.787e-10                     | 56.99 9.55               |
| 2   | 43                  | rs10495907 rs10495907                | LDL TOTAL_CHOLESTROL           | ABCG5 DYNC2L1 PLEKH2 RN7SKP66                                                                                                    | 1.264e-13 3.085e-11                     | 12.9 10.51               |
| 2   | 44                  | rs6544713 rs6544713                  | LDL TOTAL_CHOLESTROL           | ABCG5 ABCG8 DYNC2L1 LRPPRC RNU6-1048P                                                                                            | 4.843e-83 1.685e-81                     | 82.31 80.77              |
| 2   | 62                  | rs1534420                            | LDL                            | AC092155.4 EHBP1                                                                                                                 | 3.896e-08                               | 7.41                     |
| 2   | 63                  | rs2710642                            | LDL                            | EHBP1 RP11-443F16.1                                                                                                              | 6.089e-09                               | 8.22                     |
| 2   | 118                 | rs10490626 rs17526895                | LDL TOTAL_CHOLESTROL           | INSIG2 AC009303.1 CCD93 RN75L111P                                                                                                | 1.697e-12 5.777e-09                     | 11.77 8.24               |
| 2   | 121                 | rs2030746 rs2030746                  | LDL TOTAL_CHOLESTROL           | AC073257.1 AC073257.2                                                                                                            | 8.605e-09 3.603e-08                     | 8.07 7.44                |
| 2   | 135                 | rs16831243 rs6730157                 | LDL TOTAL_CHOLESTROL           | CCNT2 MAP3K19 RAB3GAP1 SNORA40 ZRANB3                                                                                            | 9.063e-12 1.179e-13                     | 11.04 12.93              |
| 2   | 136                 | rs4988235 rs4988235                  | LDL TOTAL_CHOLESTROL           | AC011893.3 AC011999.1 LCT MCM6 Y_RNA                                                                                             | 3.218e-11 3.975e-14                     | 10.49 13.4               |
| 2   | 165                 | rs7607980 rs10195252 rs13389219      | HDL LDL TRIGS                  | AC019181.3 COBLL1 SNORA70F GRB14                                                                                                 | 1.807e-15 3.812e-08 2.598e-15           | 14.74 7.42 14.59         |
| 2   | 169                 | rs2287623 rs2287623                  | LDL TOTAL_CHOLESTROL           | ABC811                                                                                                                           | 5.399e-08 4.085e-12                     | 7.27 11.39               |
| 2   | 203                 | rs934287 rs11694172                  | LDL TOTAL_CHOLESTROL           | ICAIL KRT8P15 WDR12 AC009960.3 AC009960.6 AC009960.7 FAM117B MTND4P30                                                            | 1.214e-07 1.951e-09                     | 6.92 8.71                |
| 2   | 204                 | rs1174604                            | TOTAL_CHOLESTROL               | RAPH1                                                                                                                            | 3.115e-07                               | 6.51                     |
| 2   | 211                 | rs1047891                            | HDL                            | CPS1                                                                                                                             | 8.73e-10                                | 9.06                     |
| 2   | 216                 | rs1250229 rs1250229                  | LDL TOTAL_CHOLESTROL           | AC012462.1 AC012462.2 AC012462.3 FN1                                                                                             | 3.13e-08 2.382e-07                      | 7.5 6.62                 |
| 2   | 227                 | rs1515110 rs2972146                  | HDL TRIGS                      |                                                                                                                                  | 8.038e-18 2.974e-15                     | 17.09 14.53              |
| 2   | 234                 | rs11563251 rs11563251                | LDL TOTAL_CHOLESTROL           | AC114812.10 AC114812.5 AC114812.9 DNAJB3 MROH2A RPL17P11 UGT1A1 UGT1A10 UGT1A2P UGT1A3 UGT1A4 UGT1A5 UGT1A6 UGT1A7 UGT1A8 UGT1A9 | 4.499e-08 1.266e-09                     | 7.35 8.9                 |

**Supplementary Table 5:** PheGWAS findings showcasing Chromosome Number, Marker Name, Associated Traits, Genes and the respective p-values for Chromosome 3

| Chr | Position group (Mb) | Marker Name                              | Associated Traits              | Genes                                                       | P-Values                               | -log10 (P-value)       |
|-----|---------------------|------------------------------------------|--------------------------------|-------------------------------------------------------------|----------------------------------------|------------------------|
| 3   | 11                  | rs2606736                                | HDL                            | ATG7                                                        | 4.799e-08                              | 7.32                   |
| 3   | 12                  | rs2292101 rs9875338 rs10440120 rs7616006 | HDL LDL TRIGS TOTAL_CHOLESTROL | PPARG GSTM5P1 TSEN2 SYN2                                    | 1.359e-07 2.21e-11 5.343e-11 8.406e-17 | 6.87 10.66 10.27 16.08 |
| 3   | 32                  | rs7640978 rs7640978                      | LDL TOTAL_CHOLESTROL           | AC104306.1 AC104306.2 CMTM6 CMTM7 DYNCL1L1                  | 9.837e-09 1.658e-08                    | 8.01 7.78              |
| 3   | 47                  | rs2290547                                | HDL                            | CCDC12 NBEAL2 NRADDP SETD2                                  | 3.69e-09                               | 8.43                   |
| 3   | 49                  | rs7613875                                | HDL                            | CTD-2330K9.2 CTD-2330K9.3 MON1A MST1R RBM6                  | 1.792e-11                              | 10.75                  |
| 3   | 50                  | rs2013208                                | HDL                            | RBMS RBM6 RP11-493K19.3                                     | 8.916e-12                              | 11.05                  |
| 3   | 52                  | rs13326165                               | HDL                            | NISCH NTSDC2 PBRM1 SMIM4 STAB1 TNNC1                        | 9.042e-11                              | 10.04                  |
| 3   | 53                  | rs2336725                                | HDL                            | AC096887.1 RFT1 RP11-894J14.5 SERBP1P3 SFMBT1               | 2.316e-07                              | 6.64                   |
| 3   | 58                  | rs13315871                               | TOTAL_CHOLESTROL               | PDHB PXK RP11-802023.3                                      | 3.48e-08                               | 7.46                   |
| 3   | 119                 | rs6805251                                | HDL                            | GSK3B NR112 PHBP8                                           | 1.332e-08                              | 7.88                   |
| 3   | 131                 | rs13076253                               | HDL                            | CPNE4 MIR5704                                               | 4.961e-09                              | 8.3                    |
| 3   | 132                 | rs17404153 rs17404153                    | LDL TOTAL_CHOLESTROL           | DNAJC13 NIP7P2                                              | 1.832e-09 1.362e-07                    | 8.74 6.87              |
| 3   | 135                 | rs687339 rs645040                        | HDL TRIGS                      | MSL2 PCCB RP11-463H24.1                                     | 7.108e-13 1.83e-12                     | 12.15 11.74            |
| 3   | 136                 | rs1279840 rs12630999                     | HDL TRIGS                      | PCCB STAG1 HMGNI1P10 RNY4P4                                 | 2.135e-12 3.151e-10                    | 11.67 9.5              |
| 3   | 142                 | rs4683438                                | TOTAL_CHOLESTROL               | PAQR9 PCOLCE2 RP11-372E1.4 RP11-372E1.6 RP11-372E1.7 U2SURP | 2.509e-07                              | 6.6                    |
| 3   | 156                 | rs1482852                                | HDL                            | LEKR1 LINC00880 LINC00881 RP11-6F2.5                        | 6.34e-08                               | 7.2                    |
| 3   | 170                 | rs10513688                               | TRIGS                          | RNU1-70P SLC2A2                                             | 1.543e-07                              | 6.81                   |

**Supplementary Table 6:** PheGWAS findings showcasing Chromosome Number, Marker Name, Associated Traits, Genes and the respective p-values for Chromosome 4

| Chr | Position group (Mb) | Marker Name                   | Associated Traits          | Genes                                            | P-Values                     | -log10 (P-value) |
|-----|---------------------|-------------------------------|----------------------------|--------------------------------------------------|------------------------------|------------------|
| 4   | 3                   | rs6818397 rs6831256 rs6818397 | LDL TRIGS TOTAL_CHOLESTROL | DOK7 HGFAC RGS12 AL590235.1 LRPAP1 RP11-529E10.6 | 1.677e-08 1.602e-12 9.51e-11 | 7.78 11.8 10.02  |
| 4   | 26                  | rs10019888                    | HDL                        |                                                  | 4.901e-08                    | 7.31             |
| 4   | 69                  | rs176813                      | TOTAL_CHOLESTROL           | RP11-1267H10.4                                   | 1.178e-07                    | 6.93             |
| 4   | 87                  | rs3775228 rs3736669           | HDL TRIGS                  | AFF1                                             | 4.53e-09 6.542e-15           | 8.34 14.18       |
| 4   | 88                  | rs442177 rs442177             | HDL TRIGS                  | AFF1                                             | 2.193e-09 1.316e-18          | 8.66 17.88       |
| 4   | 89                  | rs3822072 rs13133548          | HDL TRIGS                  | FAM13A                                           | 4.058e-12 2.108e-07          | 11.39 6.68       |
| 4   | 100                 | rs2602836                     | HDL                        | ADH4 ADH5 METAP1 RP11-571L19.8 RP11-696N14.1     | 4.964e-08                    | 7.3              |
| 4   | 102                 | rs17199964                    | HDL                        | BANK1                                            | 1.843e-07                    | 6.73             |
| 4   | 103                 | rs13107325                    | HDL                        | SLC39A8                                          | 1.065e-15                    | 14.97            |
| 4   | 157                 | rs6822892                     | HDL                        | PDGFC RP11-154F14.2                              | 1.933e-07                    | 6.71             |

**Supplementary Table 7:** PheGWAS findings showcasing Chromosome Number, Marker Name, Associated Traits, Genes and the respective p-values for Chromosome 5

| Chr | Position group (Mb) | Marker Name                   | Associated Traits          | Genes                                                   | P-Values                     | -log10 (P-value)  |
|-----|---------------------|-------------------------------|----------------------------|---------------------------------------------------------|------------------------------|-------------------|
| 5   | 53                  | rs6450176                     | HDL                        | ARL15 RN7SL801P                                         | 6.875e-10                    | 9.16              |
| 5   | 55                  | rs3936511 rs9686661           | HDL TRIGS                  | AC022431.2 AC022431.3                                   | 2.959e-09 2.541e-16          | 8.53 15.59        |
| 5   | 67                  | rs4976033                     | HDL                        | CTC-537E7.3 CTD-2582M21.1                               | 6.421e-08                    | 7.19              |
| 5   | 74                  | rs12916 rs12916               | LDL TOTAL_CHOLESTROL       | COL4A3BP CTD-2235C13.1 CTD-2235C13.2 CTD-2235C13.3 HMGR | 7.792e-78 4.547e-74          | 77.11 73.34       |
| 5   | 75                  | rs2112347 rs2112347           | LDL TOTAL_CHOLESTROL       | ANKDD1B POC5 RNU6-680P SLC25A5P9                        | 4.43e-30 1.72e-33            | 29.35 32.76       |
| 5   | 122                 | rs4530754 rs4530754           | LDL TOTAL_CHOLESTROL       | CSNK1G3 Y_RNA                                           | 3.576e-12 1.678e-09          | 11.45 8.78        |
| 5   | 156                 | rs6882076 rs6882076 rs6882076 | LDL TRIGS TOTAL_CHOLESTROL | APOOP1 TIMD4                                            | 3.31e-31 1.513e-15 5.354e-41 | 30.48 14.82 40.27 |
| 5   | 173                 | rs72812840                    | TRIGS                      | C5orf47 CPEB4                                           | 2.896e-07                    | 6.54              |

**Supplementary Table 8:** PheGWAS findings showcasing Chromosome Number, Marker Name, Associated Traits, Genes and the respective p-values for Chromosome 6

| Chr | Position group (Mb) | Marker Name                               | Associated Traits              | Genes                                                                                                                                                                                                              | P-Values                                | -log10 (P-value)       |
|-----|---------------------|-------------------------------------------|--------------------------------|--------------------------------------------------------------------------------------------------------------------------------------------------------------------------------------------------------------------|-----------------------------------------|------------------------|
| 6   | 16                  | rs3757354 rs3757354                       | LDL TOTAL_CHOLESTROL           | MIR4639 MRPL42P2 MYLIP RP1-13D10.2 RP1-13D10.3 RP1-13D10.5 U3                                                                                                                                                      | 2.087e-17 2.215e-15                     | 16.68 14.65            |
| 6   | 25                  | rs17526722 rs1408272 rs1408272            | HDL LDL TOTAL_CHOLESTROL       | HIST1H2AP52 SLC17A2 SLC17A3 TRIM38 SLC17A1                                                                                                                                                                         | 1.42e-07 3.675e-09 5.034e-08            | 6.85 8.43 7.3          |
| 6   | 26                  | rs1800562 rs1800562                       | LDL TOTAL_CHOLESTROL           | HFE HIST1H1C HIST1H1T HIST1H2AC HIST1H2BB HIST1H2BC HIST1H3C HIST1H4C U91328.2                                                                                                                                     | 8.253e-14 1.905e-12                     | 13.08 11.72            |
| 6   | 29                  | rs5013093                                 | TRIGS                          | HCG4P7 HCG4P8 HLA-G HLA-H HLA-T MICF MICG RPL7AP7                                                                                                                                                                  | 1.358e-07                               | 6.87                   |
| 6   | 30                  | rs1634721 rs1634721                       | TRIGS TOTAL_CHOLESTROL         | HCG22 MUC21 MUC22                                                                                                                                                                                                  | 4.015e-13 5.279e-12                     | 12.4 11.28             |
| 6   | 31                  | rs2844513 rs10947207 rs2247056 rs2247056  | HDL LDL TRIGS TOTAL_CHOLESTROL | AL671883.1 FGR3P1 HCP5 HLA-S MICA XXbac-BPG181B23.4 XXbac-BPG181B23.6 XXbac-BPG181B23.7 Y_RNA ZDHHC20P2 DHFRP2 HLA-B RNU6-283P XXbac-BPG248L24.12 HLA-C RPL3P2 USP6P1 WASF5P XXbac-BPG248L24.10 XXbac-BPG248L24.13 | 2.465e-09 2.448e-12 3.861e-21 2.203e-20 | 8.61 11.61 20.41 19.66 |
| 6   | 32                  | rs1980493 rs10947332 rs11752643 rs9391858 | HDL LDL TRIGS TOTAL_CHOLESTROL | BTNL2 C6orf10 HCG23 HLA-DRA RNU6-603P HLA-DQA2 HLA-DQB1 HLA-DQB1-AS1 HLA-DQB2 HLA-DQB3 MIR3135B MTCO3P1 XXbac-BPG254F23.6 XXbac-BPG254F23.7 HNRNP1A1P2                                                             | 3.764e-10 6.969e-18 3.96e-19 7.204e-22  | 9.42 17.16 18.4 21.14  |
| 6   | 34                  | rs205262 rs3800457 rs2814982              | HDL LDL TOTAL_CHOLESTROL       | C6orf106 RP3-391O22.2 RP3-391O22.3 SPDEF RN7SL200P RP11-140K17.2 RP11-140K17.3 RP3-375P9.2 RP3-391O22.1 snoU13 PACSIN1                                                                                             | 3.878e-13 2.3e-07 3.678e-15             | 12.41 6.64 14.43       |
| 6   | 35                  | rs3822921 rs3800406 rs3800406             | HDL LDL TOTAL_CHOLESTROL       | AL138721.1 ANKS1A TCP11 SCUBE3                                                                                                                                                                                     | 2.349e-09 9.392e-08 1.014e-13           | 8.63 7.03 12.99        |
| 6   | 39                  | rs2758886 rs2758886                       | LDL TOTAL_CHOLESTROL           | KCNK16 KCNK17 KIF6                                                                                                                                                                                                 | 1.845e-07 3.008e-08                     | 6.73 7.52              |
| 6   | 43                  | rs998584 rs998584                         | HDL TRIGS                      | RP1-261G23.7 VEGFA                                                                                                                                                                                                 | 2.269e-11 3.424e-15                     | 10.64 14.47            |
| 6   | 109                 | rs884366                                  | HDL                            | C6orf183 CCDC162P PTCHD3P3 RP11-425D10.1 snoU13                                                                                                                                                                    | 1.671e-07                               | 6.78                   |
| 6   | 116                 | rs6909746 rs11153594                      | LDL TOTAL_CHOLESTROL           | FRK TPI1P3                                                                                                                                                                                                         | 7.86e-11 1.266e-14                      | 10.1 13.9              |
| 6   | 127                 | rs1936800 rs719726                        | HDL TRIGS                      | RSPO3                                                                                                                                                                                                              | 3.055e-10 2.486e-08                     | 9.51 7.6               |
| 6   | 135                 | rs9376090                                 | TOTAL_CHOLESTROL               | CTA-212D2.2 HBS1L                                                                                                                                                                                                  | 2.595e-09                               | 8.59                   |
| 6   | 139                 | rs3861397 rs634869                        | HDL TRIGS                      | RP11-12A2.3                                                                                                                                                                                                        | 8.401e-11 1.776e-14                     | 10.08 13.75            |
| 6   | 152                 | rs12525163                                | HDL                            | ESR1                                                                                                                                                                                                               | 1.524e-07                               | 6.82                   |
| 6   | 160                 | rs8457931 rs1564348 rs2665357 rs11753995  | HDL LDL TRIGS TOTAL_CHOLESTROL | LPA LPAL2 IGFBP3 RP11-288H12.4 RP11-317M22.1 SLC22A1 SLC22A2 AL591069.1 SLC22A3                                                                                                                                    | 7.287e-13 2.762e-21 8.327e-10 1.639e-23 | 12.14 20.56 9.08 22.74 |
| 6   | 161                 | rs1084651 rs10458872 rs10458872           | HDL LDL TOTAL_CHOLESTROL       | LPA PLG RP1-81D8.3 RP1-81D8.4                                                                                                                                                                                      | 1.347e-11 1.936e-15 7.236e-17           | 10.87 14.71 16.14      |

**Supplementary Table 9:** PheGWAS findings showcasing Chromosome Number, Marker Name, Associated Traits, Genes and the respective p-values for Chromosome 7

| Chr | Position group (Mb) | Marker Name                   | Associated Traits          | Genes                                                                       | P-Values                      | -log10 (P-value) |
|-----|---------------------|-------------------------------|----------------------------|-----------------------------------------------------------------------------|-------------------------------|------------------|
| 7   | 1                   | rs1997243 rs1997243           | HDL TOTAL_CHOLESTROL       | AC073957.15 AC091729.7 AC091729.8 C7orf50 GPER1 GPR146 MIR339 RP11-449P15.1 | 2.27e-07 2.719e-10            | 6.64 9.57        |
| 7   | 6                   | rs702485                      | HDL                        | DAGLB KDELR2 RAC1                                                           | 6.45e-12                      | 11.19            |
| 7   | 16                  | rs17286602                    | HDL                        | AC006035.1 ISPD RP11-196O16.1                                               | 2.932e-07                     | 6.53             |
| 7   | 17                  | rs4142995                     | HDL                        | SNX13                                                                       | 9.365e-12                     | 11.03            |
| 7   | 21                  | rs12670798 rs12670798         | LDL TOTAL_CHOLESTROL       | DNAH11                                                                      | 4.812e-14 9.478e-17           | 13.32 16.02      |
| 7   | 25                  | rs4722551 rs4719841 rs4722551 | LDL TRIGS TOTAL_CHOLESTROL | CTD-2227E11.1 MIR148A                                                       | 3.949e-14 8.864e-11 7.019e-09 | 13.4 10.05 8.15  |
| 7   | 44                  | rs2073547 rs2073547           | LDL TOTAL_CHOLESTROL       | AC004938.5 DDX56 NPC1L1 RNU6-1097P TMED4                                    | 1.923e-21 3.83e-21            | 20.72 20.42      |
| 7   | 50                  | rs4917014                     | HDL                        | AC020743.4 IKZF1                                                            | 1.026e-08                     | 7.99             |
| 7   | 71                  | rs2909969                     | TRIGS                      | TYW1B                                                                       | 1.528e-07                     | 6.82             |
| 7   | 72                  | rs17145738 rs11974409         | HDL TRIGS                  | BAZ1B BCL7B MLXIPL TBL2                                                     | 4.952e-13 1.36e-100           | 12.31 99.87      |
| 7   | 73                  | rs17145750 rs17145750         | HDL TRIGS                  | MLXIPL TBL2                                                                 | 5.654e-12 1.03e-99            | 11.25 98.99      |
| 7   | 116                 | rs38855                       | TRIGS                      | MET                                                                         | 2.109e-08                     | 7.68             |
| 7   | 130                 | rs11765979 rs287621           | HDL TRIGS                  | KLF14 RP11-368B6.1                                                          | 3.111e-17 7.671e-09           | 16.51 8.12       |
| 7   | 150                 | rs17173637                    | HDL                        | AOC1 RPS-105134.4 TMEM176A TMEM176B                                         | 1.899e-08                     | 7.72             |



**Supplementary Table 10: PheGWAS findings showcasing Chromosome Number, Marker Name, Associated Traits, Genes and the respective p-values for Chromosome 8**

| Chr | Position group (Mb) | Marker Name                              | Associated Traits              | Genes                                                                        | P-Values                                | -log10 (P-value)         |
|-----|---------------------|------------------------------------------|--------------------------------|------------------------------------------------------------------------------|-----------------------------------------|--------------------------|
| 8   | 8                   | rs2976940                                | TRIGS                          | CTA-398F10.1 CTA-398F10.2 SGK223                                             | 1.138e-08                               | 7.94                     |
| 8   | 9                   | rs4240624 rs9987289 rs9693857 rs9987289  | HDL LDL TRIGS TOTAL_CHOLESTROL | RNU6-1151P RNU6-526P RP11-115J16.1 RP11-115J16.2 RP11-115J16.3 RP11-375N15.1 | 1.323e-45 8.529e-24 1.691e-08 1.844e-36 | 44.88 23.07 7.77 35.73   |
| 8   | 10                  | rs7014168 rs6995541                      | HDL TRIGS                      | CTD-2135J3.3 PINX1 SNORD112 SOX7 RP11-177H2.2                                | 9.203e-10 1.343e-12                     | 9.04 11.87               |
| 8   | 11                  | rs1062219                                | TRIGS                          | C8orf49 DFDT1 GATA4 NEIL2 RP11-297N6.4 SUB1P1                                | 1.686e-09                               | 8.77                     |
| 8   | 18                  | rs1961456 rs4921914 rs1961456            | LDL TRIGS TOTAL_CHOLESTROL     | NAT2 NATP RP11-685B14.1 RP11-685B14.3                                        | 6.883e-08 4.867e-17 3.458e-16           | 7.16 16.31 15.46         |
| 8   | 19                  | rs13702 rs12678919                       | HDL TRIGS                      | LPL                                                                          | 1.28e-160 1.82e-199                     | 159.89 198.74            |
| 8   | 55                  | rs10102164 rs10102164                    | LDL TOTAL_CHOLESTROL           | RP11-53M11.2 RP11-53M11.3 RP11-53M11.4 SOX17                                 | 3.742e-11 4.596e-11                     | 10.43 10.34              |
| 8   | 59                  | rs13277801 rs4738684 rs4738684           | LDL TRIGS TOTAL_CHOLESTROL     | CYP7A1 RP11-114M5.1 UBXN2B RP11-114M5.3                                      | 3.994e-17 8.819e-09 1.116e-23           | 16.4 8.05 22.95          |
| 8   | 116                 | rs2293889 rs2737252 rs2737252            | HDL LDL TOTAL_CHOLESTROL       | TRPS1                                                                        | 4.271e-17 7.039e-14 1.634e-16           | 16.37 13.15 15.79        |
| 8   | 121                 | rs4871137                                | HDL                            | RP11-713M15.2 SNTB1                                                          | 1.926e-07                               | 6.72                     |
| 8   | 126                 | rs10808546 rs2954029 rs2954022 rs2954029 | HDL LDL TRIGS TOTAL_CHOLESTROL | RN75L590P RP11-136O12.2 TRIB1                                                | 4.106e-30 2.095e-50 2.23e-113 2.421e-65 | 29.39 49.68 112.65 64.62 |
| 8   | 144                 | rs10087900 rs6984820 rs6984820           | HDL LDL TOTAL_CHOLESTROL       | GLI4 GPIHBP1 ZFP41 EPPK1 MIR661 PLEC                                         | 2.174e-09 3.769e-09 1.634e-07           | 8.66 8.42 6.79           |
| 8   | 145                 | rs7832643 rs7832643                      | LDL TOTAL_CHOLESTROL           | GRINA MIR661 PPAR10 PLEC                                                     | 2.671e-17 3.121e-13                     | 16.57 12.51              |

**Supplementary Table 11: PheGWAS findings showcasing Chromosome Number, Marker Name, Associated Traits, Genes and the respective p-values for Chromosome 9**

| Chr | Position group (Mb) | Marker Name                             | Associated Traits              | Genes                                                                | P-Values                                | -log10 (P-value)       |
|-----|---------------------|-----------------------------------------|--------------------------------|----------------------------------------------------------------------|-----------------------------------------|------------------------|
| 9   | 2                   | rs3780181 rs3780181                     | LDL TOTAL_CHOLESTROL           | RP11-125B21.2 VLDLR                                                  | 1.764e-09 6.668e-10                     | 8.75 9.18              |
| 9   | 15                  | rs686030 rs686030 rs581080              | HDL TRIGS TOTAL_CHOLESTROL     | RN75L157P TTC39B                                                     | 4.292e-27 2.226e-07 1.022e-13           | 26.37 6.65 12.99       |
| 9   | 16                  | rs3927680                               | LDL                            | BNC2                                                                 | 2.15e-07                                | 6.67                   |
| 9   | 19                  | rs10757056                              | TOTAL_CHOLESTROL               | ACER2 DENND4C NDUFA5P3 RP11-363E7.4 RP11-513M16.7 RP11-513M16.8 RPS6 | 5.361e-08                               | 7.27                   |
| 9   | 107                 | rs1883025 rs1883025 rs1883025 rs1883025 | HDL LDL TRIGS TOTAL_CHOLESTROL | ABCA1 RP11-217B7.2                                                   | 1.496e-65 6.141e-11 2.908e-07 5.749e-53 | 64.83 10.21 6.54 52.24 |
| 9   | 136                 | rs579459 rs579459                       | LDL TOTAL_CHOLESTROL           | ABO LCN1P2 RP11-430N14.4 SURF6 Y_RNA                                 | 2.419e-44 8.828e-42                     | 43.62 41.05            |

**Supplementary Table 12: PheGWAS findings showcasing Chromosome Number, Marker Name, Associated Traits, Genes and the respective p-values for Chromosome 10**

| Chr | Position group (Mb) | Marker Name                             | Associated Traits              | Genes                                          | P-Values                              | -log10 (P-value)       |
|-----|---------------------|-----------------------------------------|--------------------------------|------------------------------------------------|---------------------------------------|------------------------|
| 10  | 5                   | rs1832007                               | TRIGS                          | AKR1C4 AKR1C1L1 RP11-445P17.3 RP11-445P17.6 U8 | 1.718e-12                             | 11.76                  |
| 10  | 17                  | rs10904908 rs10904908                   | LDL TOTAL_CHOLESTROL           | RP11-124N14.3 TRDMT1 VIM VIM-AS1               | 3.135e-07 2.601e-11                   | 6.5 10.58              |
| 10  | 45                  | rs10900221 rs10900221                   | HDL TOTAL_CHOLESTROL           | ALOX5 MARCH8 RP11-67C2.2                       | 1.004e-09 7.963e-09                   | 9 8.1                  |
| 10  | 46                  | rs970548 rs970548                       | HDL TOTAL_CHOLESTROL           | MARCH8                                         | 1.706e-10 8.431e-09                   | 9.77 8.07              |
| 10  | 64                  | rs7073746 rs7073746                     | HDL TRIGS                      | JMJD1C NRBF2 RNU6-543P RP11-144G16.1           | 1.791e-08 1.234e-15                   | 7.75 14.91             |
| 10  | 65                  | rs10761771 rs10761762                   | HDL TRIGS                      | JMJD1C JMJD1C-AS1 PRELID1P3 RP11-351O1.3       | 4.12e-09 1.061e-17                    | 8.39 16.97             |
| 10  | 94                  | rs8211 rs2068888                        | HDL TRIGS                      | CYP26A1 CYP26C1 EXOC6 NIP7P1 RP11-348J12.2     | 8.049e-08 1.682e-11                   | 7.09 10.77             |
| 10  | 113                 | rs2250802 rs2419604 rs2250802 rs2255141 | HDL LDL TRIGS TOTAL_CHOLESTROL | GPAM                                           | 2.022e-17 7.49e-14 1.21e-10 6.514e-16 | 16.69 13.13 9.92 15.19 |
| 10  | 114                 | rs2148489 rs2148489                     | HDL TOTAL_CHOLESTROL           | GUCY2GP TECTB                                  | 1.412e-10 2.366e-10                   | 9.85 9.63              |
| 10  | 115                 | rs7076938                               | HDL                            | ADRB1                                          | 1.712e-07                             | 6.77                   |

**Supplementary Table 13: PheGWAS findings showcasing Chromosome Number, Marker Name, Associated Traits, Genes and the respective p-values for Chromosome 11**

| Chr | Position group (Mb) | Marker Name                           | Associated Traits              | Genes                                                                            | P-Values                                | -log10 (P-value)        |
|-----|---------------------|---------------------------------------|--------------------------------|----------------------------------------------------------------------------------|-----------------------------------------|-------------------------|
| 11  | 10                  | rs2923084                             | HDL                            | AMPD3 RNU6ATAC33P                                                                | 5.02e-08                                | 7.3                     |
| 11  | 14                  | rs2303975                             | HDL                            | RP11-21L19.1 RRA52 SPON1                                                         | 1.585e-07                               | 6.8                     |
| 11  | 18                  | rs10832962 rs10832962                 | LDL TOTAL_CHOLESTROL           | RP11-137N23.1 RP11-504G3.4 SPTY2D1 SPTY2D1-AS1 UEVLD                             | 6.619e-14 1.539e-14                     | 13.18 13.81             |
| 11  | 45                  | rs74458891                            | HDL                            | CTD-2210P24.1 CTD-2210P24.2 CTD-2210P24.3                                        | 6.492e-09                               | 8.19                    |
| 11  | 46                  | rs3136441 rs6485690                   | HDL TRIGS                      | ARHGAP1 ATG13 CKAP5 F2 MIR5582 SNORD67 ZNF408                                    | 6.759e-29 2.061e-07                     | 28.17 6.69              |
| 11  | 47                  | rs3847502 rs10501321 rs1681630        | HDL TRIGS TOTAL_CHOLESTROL     | MADD MYBPC3 NR1H3 RP11-17G12.3 SP11 ACP2 DD82 PTPRJ RP11-793111.1                | 3.306e-38 1.412e-08 6.929e-08           | 37.48 7.85 7.16         |
| 11  | 48                  | rs7946766 rs4752805                   | HDL TOTAL_CHOLESTROL           | AC103828.1 PTPRJ                                                                 | 4.967e-24 1.617e-09                     | 23.3 8.79               |
| 11  | 49                  | rs11040329                            | HDL                            | CTD-2026G22.1                                                                    | 5.46e-12                                | 11.26                   |
| 11  | 50                  | rs2201637                             | HDL                            | RP11-227P3.1 RP11-347H15.1                                                       | 5.273e-10                               | 9.28                    |
| 11  | 51                  | rs11246602                            | HDL                            | OR4C46 OR4C50P OR4C7P OR4R2P                                                     | 1.681e-10                               | 9.77                    |
| 11  | 55                  | rs11229606                            | HDL                            | OR4A10P OR4A13P OR4A14P OR4A17P OR4A50P OR4A9P OR4X7P RP11-13134.12              | 3.117e-10                               | 9.51                    |
| 11  | 56                  | rs6591323                             | HDL                            | ORSAL1 ORSAL2P OR5M4P OR5M9 OR5R1 OR8L1P OR8U1                                   | 1.508e-08                               | 7.82                    |
| 11  | 61                  | rs102275 rs174583 rs174535 rs1535     | HDL LDL TRIGS TOTAL_CHOLESTROL | DAGLA FADS1 FADS2 FEN1 MIR1908 MIR611 MYRF RP11-467L20.1 TMEM258 FADS3           | 6.404e-28 7.003e-41 1.733e-41 8.624e-39 | 27.19 40.15 40.76 38.06 |
| 11  | 65                  | rs12801636                            | HDL                            | AP001362.1 EHBPI11 FAM89B KCNK7 MAP3K11 MIR4489 MIR4690 PCNXL3 RELA SIPA1 SSSCA1 | 3.147e-08                               | 7.5                     |
| 11  | 75                  | rs499974                              | HDL                            | CTD-2530H12.1 CTD-2530H12.2 DGAT2 MOGAT2 RN75L786P                               | 1.12e-08                                | 7.95                    |
| 11  | 116                 | rs964184 rs964184 rs10790162 rs964184 | HDL LDL TRIGS TOTAL_CHOLESTROL | AP006216.10 AP006216.11 AP006216.5 APOA4 APOA5 BUD13 ZNF259                      | 6.086e-48 2.008e-26 1.1e-249 2.838e-55  | 47.22 25.7 248.96 54.55 |
| 11  | 117                 | rs508487 rs508487 rs508487 rs508487   | HDL LDL TRIGS TOTAL_CHOLESTROL | PAFAH1B2 PCSK7 RNF214 SIDT2 TAGLN                                                | 5.45e-11 1.773e-10 9.22e-119 1.002e-27  | 10.26 9.75 118.04 27    |
| 11  | 118                 | rs11603023                            | TOTAL_CHOLESTROL               | AP002954.3 ARCN1 IFT46 PHLDB1 RNU6-1157P TREH                                    | 1.151e-08                               | 7.94                    |
| 11  | 122                 | rs7117842 rs7117842                   | HDL TOTAL_CHOLESTROL           | GLULP3 RP11-266E8.2 UBASH3B                                                      | 1.057e-14 2.479e-15                     | 13.98 14.61             |
| 11  | 126                 | rs17135399 rs10893499 rs11220462      | HDL LDL TOTAL_CHOLESTROL       | DCP5 RP11-712L6.5 ST3GAL4 TIRAP KIRREL3                                          | 4.26e-09 3.861e-21 5.487e-15            | 8.37 20.41 14.26        |

**Supplementary Table 14: PheGWAS findings showcasing Chromosome Number, Marker Name, Associated Traits, Genes and the respective p-values for Chromosome 12**

| Chr | Position group (Mb) | Marker Name                   | Associated Traits        | Genes                                                                                                                                                              | P-Values                      | -log10 (P-value)  |
|-----|---------------------|-------------------------------|--------------------------|--------------------------------------------------------------------------------------------------------------------------------------------------------------------|-------------------------------|-------------------|
| 12  | 9                   | rs4883201                     | TOTAL_CHOLESTROL         | A2ML1 KLRG1 M6PR PHC1                                                                                                                                              | 1.742e-09                     | 8.76              |
| 12  | 20                  | rs11045163                    | HDL                      |                                                                                                                                                                    | 3.196e-09                     | 8.5               |
| 12  | 21                  | rs4149056                     | TRIGS                    | RP11-125O5.2 SLCO1B1                                                                                                                                               | 1.782e-07                     | 6.75              |
| 12  | 50                  | rs10876041                    | TOTAL_CHOLESTROL         | DIP2B LARP4                                                                                                                                                        | 1.028e-07                     | 6.99              |
| 12  | 57                  | rs3741414 rs11613352          | HDL TRIGS                | AC126614.1 ARHGAP9 GLI1 INHBC INHBE MARS R3HDM2 RNU6-879P RP11-756H6.1                                                                                             | 6.095e-14 9.397e-14           | 13.22 13.03       |
| 12  | 107                 | rs10861661                    | TRIGS                    | RFX4 RICBB RP11-144F15.1 RP11-482D24.3                                                                                                                             | 2.598e-07                     | 6.59              |
| 12  | 109                 | rs2241210 rs12321904          | HDL TOTAL_CHOLESTROL     | KCTD10 MMAB UBE3B MVK RNU4-32P                                                                                                                                     | 2.489e-20 2.077e-08           | 19.6 7.68         |
| 12  | 110                 | rs10850380 rs10850380         | HDL TOTAL_CHOLESTROL     | MMAB MVK RNU4-32P UBE3B                                                                                                                                            | 4.058e-19 2.561e-08           | 18.39 7.59        |
| 12  | 111                 | rs3184504 rs3184504 rs3184504 | HDL LDL TOTAL_CHOLESTROL | AC002395.1 ATXN2 RP3-473L9.4 SH2B3                                                                                                                                 | 4.097e-12 4.203e-12 1.623e-17 | 11.39 11.38 16.79 |
| 12  | 112                 | rs653178 rs11065987 rs653178  | HDL LDL TOTAL_CHOLESTROL | ATXN2 RP11-686G8.1 RP11-686G8.2 U7 BRAP PCNPP1                                                                                                                     | 1.064e-12 1.204e-11 1.038e-16 | 11.97 10.92 15.98 |
| 12  | 113                 | rs12580178                    | LDL                      | RPH3A                                                                                                                                                              | 2.307e-08                     | 7.64              |
| 12  | 121                 | rs1169288 rs2244608           | LDL TOTAL_CHOLESTROL     | AC079602.1 C12orf43 HNF1A HNF1A-AS1 OASL RP11-216P1.2                                                                                                              | 6.447e-21 9.618e-18           | 20.19 17.02       |
| 12  | 122                 | rs11057405 rs895953           | HDL TRIGS                | CLIP1 RP11-512M8.3 RP11-512M8.5 VPS33A AC084018.1 HPD RHOF RP11-347119.8 RP11-7M8.2 SETD1B TMEM120B                                                                | 1.231e-09 8.578e-08           | 8.91 7.07         |
| 12  | 123                 | rs2454722 rs10773003          | HDL TOTAL_CHOLESTROL     | HCAR1 HCAR2 HCAR3 RP11-324E6.6 RP11-324E6.9 C12orf65 CDK2AP1 MPHOSPH9 RNASSP375 RP11-282O18.3 RP11-282O18.6 RP11-282O18.7 SBN01                                    | 3.308e-14 4.083e-09           | 13.48 8.39        |
| 12  | 124                 | rs7973683 rs11057408          | HDL TRIGS                | CCDC92 DNAH10 DNAH10OS FAM101A RP11-214K3.18 RP11-214K3.19 RP11-214K3.20 RP11-214K3.21 RP11-214K3.22 RP11-214K3.23 RP11-214K3.5 RP11-380L11.3 RP11-380L11.4 ZNF664 | 5.259e-14 2.049e-12           | 13.28 11.69       |
| 12  | 125                 | rs838876                      | HDL                      | SCARB1                                                                                                                                                             | 7.325e-33                     | 32.14             |
| 12  | 133                 | rs12423664                    | TRIGS                    | FBRSL1 MUC8 RP11-503G7.1 RP11-503G7.2                                                                                                                              | 8.189e-08                     | 7.09              |

**Supplementary Table 15:** PheGWAS findings showcasing Chromosome Number, Marker Name, Associated Traits, Genes and the respective p-values for Chromosome 13

| Chr | Position group (Mb) | Marker Name         | Associated Traits    | Genes                                      | P-Values            | -log10 (P-value) |
|-----|---------------------|---------------------|----------------------|--------------------------------------------|---------------------|------------------|
| 13  | 32                  | rs4942486 rs4942486 | LDL TOTAL_CHOLESTROL | BRCA2 IFIT1P1 N48P2L1 RP11-298P3.4 SNORA16 | 2.261e-11 7.084e-08 | 10.65 7.15       |

**Supplementary Table 16:** PheGWAS findings showcasing Chromosome Number, Marker Name, Associated Traits, Genes and the respective p-values for Chromosome 14

| Chr | Position group (Mb) | Marker Name         | Associated Traits    | Genes                                                                                 | P-Values            | -log10 (P-value) |
|-----|---------------------|---------------------|----------------------|---------------------------------------------------------------------------------------|---------------------|------------------|
| 14  | 24                  | rs8017377 rs6573778 | LDL TOTAL_CHOLESTROL | CBLN3 KHNYN NFATC4 NYNRIN SDR39U1                                                     | 2.516e-15 2.958e-11 | 14.6 10.53       |
| 14  | 105                 | rs4983559           | HDL                  | AKT1 CTD-3051D23.1 CTD-3051D23.4 LINC00638 RP11-982M15.2 RPS26P49 RPS2P4 SIVA1 ZBTB42 | 9.565e-09           | 8.02             |

**Supplementary Table 17:** PheGWAS findings showcasing Chromosome Number, Marker Name, Associated Traits, Genes and the respective p-values for Chromosome 15

| Chr | Position group (Mb) | Marker Name                    | Associated Traits          | Genes                                                                  | P-Values                      | -log10 (P-value)   |
|-----|---------------------|--------------------------------|----------------------------|------------------------------------------------------------------------|-------------------------------|--------------------|
| 15  | 41                  | rs721772                       | HDL                        | ITPKA LTK RPAP1 TCEB1P2 TYRO3                                          | 2.358e-07                     | 6.63               |
| 15  | 42                  | rs2412710 rs2412710            | HDL TRIGS                  | CAPN3 GANC RNU6-188P RP11-164J13.1 ZNF106                              | 1.36e-09 1.658e-11            | 8.87 10.78         |
| 15  | 43                  | rs486301                       | TRIGS                      | CKMT1B MAP1A PPIPSK1 TPS3BP1                                           | 5.816e-08                     | 7.24               |
| 15  | 44                  | rs492571 rs16948098            | HDL TRIGS                  | FRMD5 PIN4P1                                                           | 1.265e-12 4.838e-17           | 11.9 16.32         |
| 15  | 58                  | rs10468017 rs588136 rs10468017 | HDL TRIGS TOTAL_CHOLESTROL | ALDH1A2 LIPC RP11-355N15.1                                             | 1.21e-188 3.365e-30 7.232e-48 | 187.92 29.47 47.14 |
| 15  | 59                  | rs424346                       | HDL                        | ADAM10 RN75KP95 RP11-123C21.1 RP11-123C21.2 RP11-30K9.6 RP11-30K9.7 U3 | 4.84e-08                      | 7.32               |
| 15  | 63                  | rs2652834 rs2652834            | HDL TRIGS                  | LACTB RP11-244F12.2 RP11-69G7.1 RPS27L TPM1                            | 3.592e-11 1.918e-08           | 10.44 7.72         |
| 15  | 72                  | rs1035744                      | TRIGS                      | CELF6 PARP6 PKM RP11-106M3.2 RP11-106M3.3                              | 1.448e-07                     | 6.84               |
| 15  | 73                  | rs2415168                      | TRIGS                      | ADPGK ADPGK-AS1                                                        | 2.775e-07                     | 6.56               |

**Supplementary Table 18:** PheGWAS findings showcasing Chromosome Number, Marker Name, Associated Traits, Genes and the respective p-values for Chromosome 16

| Chr | Position group (Mb) | Marker Name                              | Associated Traits             | Genes                                                                                                                                       | P-Values                       | -log10 (P-value)         |
|-----|---------------------|------------------------------------------|-------------------------------|---------------------------------------------------------------------------------------------------------------------------------------------|--------------------------------|--------------------------|
| 16  | 15                  | rs3198697                                | TRIGS                         | MIR1972-1 NTAN1 PDXDC1 RP11-680G24.4 RP11-680G24.5 RRN3                                                                                     | 2.207e-08                      | 7.66                     |
| 16  | 30                  | rs11649653                               | TRIGS                         | AC106782.20 AC135048.13 BCL7C CTF1 CTF2P FBXL19 FBXL19-AS1 MIR4519 MIR762 ORA3                                                              | 1.56e-07                       | 6.81                     |
| 16  | 31                  | rs749671                                 | TRIGS                         | AC135050.1 AC135050.5 BCKDK KAT8 PRSS53 RP11-196G11.1 RP11-196G11.2 RP11-196G11.4 STX4 VKORC1 ZNF646 ZNF668                                 | 6.106e-10                      | 9.21                     |
| 16  | 53                  | rs1121980 rs9930333                      | HDL TRIGS                     | FTO                                                                                                                                         | 6.791e-09 3.251e-08            | 8.17 7.49                |
| 16  | 56                  | rs9989419 rs247616 rs1800775 rs247616    | HDL LDL TRIGS TOTALCHOLESTROL | AC012181.1 CETP HERPUD1 NLRCS RP11-325K4.2 RP11-325K4.3 RPS24P17 SLC12A3                                                                    | 0 2.566e-37 1.332e-26 4.47e-32 | 329.32 36.59 25.88 31.35 |
| 16  | 57                  | rs59207181 rs1532624 rs7205804 rs1532624 | HDL LDL TRIGS TOTALCHOLESTROL | AC012181.1 CETP HERPUD1 NLRCS RP11-322D14.1 RP11-325K4.2 RP11-325K4.3                                                                       | 0 1.844e-26 3.431e-25 1.39e-29 | 329.32 25.73 24.46 28.86 |
| 16  | 67                  | rs16942887 rs3809630                     | HDL TOTALCHOLESTROL           | AC040162.1 CEMPT CTC-479CS.10 CTC-479CS.11 CTC-479CS.12 CTC-479CS.17 CTRL EDC4 LCAT NR1L NUTF2 PSKHI PSMB10 SLC12A4 THAP11 RANBP10 TSNAXIP1 | 8.281e-54 1.544e-08            | 53.08 7.81               |
| 16  | 68                  | rs16957696 rs13816                       | HDL TOTALCHOLESTROL           | AC130462.1 CTC-479CS.6 DDX28 DPEP2 DPEP3 DUS2 KARSP3 RNU6-359P SLC12A4                                                                      | 1.31e-46 8.945e-08             | 45.88 7.05               |
| 16  | 71                  | rs8053891 rs8053891                      | LDL TOTALCHOLESTROL           | ATPS1P3 DHODH ISET1 PKD1L3 RP11-498D10.5 RP11-498D10.6 RP11-498D10.8 RPL39P31                                                               | 3.76e-18 2.628e-18             | 17.43 17.58              |
| 16  | 72                  | rs2000999 rs2000999                      | LDL TOTALCHOLESTROL           | DHODH DHX38 HP HPR PMFBP1 RP11-384M15.3 TXNL4B                                                                                              | 4.219e-41 6.804e-41            | 40.38 40.17              |
| 16  | 81                  | rs2925979 rs2925979                      | HDL TRIGS                     | CMIP RP11-391L3.5                                                                                                                           | 1.321e-19 2.136e-07            | 18.88 6.67               |

**Supplementary Table 19: PheGWAS findings showcasing Chromosome Number, Marker Name, Associated Traits, Genes and the respective p-values for Chromosome 17**

| Chr | Position group (Mb) | Marker Name           | Associated Traits    | Genes                                                                                                 | P-Values            | -log10 (P-value) |
|-----|---------------------|-----------------------|----------------------|-------------------------------------------------------------------------------------------------------|---------------------|------------------|
| 17  | 4                   | rs8069974             | TOTAL_CHOLESTROL     | ARRB2 CXCL16 GLTPD2 MED11 PLD2 PSMB6 RP11-314A20.5 RP11-81A22.5 THMSF5 VMO1 ZMYND15                   | 7.795e-08           | 7.11             |
| 17  | 7                   | rs314253 rs314253     | LDL TOTAL_CHOLESTROL | ACADVL ASGR1 DLG4 DVL2 MIR324 PHF23 RPL7A64                                                           | 3.436e-10 2.808e-10 | 9.46 9.55        |
| 17  | 8                   | rs4791641             | LDL                  | AURKB CTC1 LINC00324 PFAS RANGFR RP11-849F2.10 RP11-849F2.8 RP11-849F2.9 SLC25A35                     | 1.314e-07           | 6.88             |
| 17  | 29                  | rs2854322             | TOTAL_CHOLESTROL     | AK4P1 NF1 RAB11FIP4                                                                                   | 2.898e-07           | 6.54             |
| 17  | 37                  | rs113612868 rs9972882 | HDL TOTAL_CHOLESTROL | AC087491.2 ERBB2 PGAP3 PNMT PPP1R1B STARD3 TCAP NEUROD2                                               | 5.447e-20 4.158e-08 | 19.26 7.38       |
| 17  | 38                  | rs8069176 rs12309     | HDL TOTAL_CHOLESTROL | GSDMB IKZF3 LRRCC3 ORMDL3 RP11-387H17.4 ZBP2 CSF3 GSDMA MED24 F5MD3 RP11-387H17.6 SNORD124 THRA       | 5.93e-13 1.953e-07  | 12.23 6.71       |
| 17  | 41                  | rs231492 rs8077889    | HDL TRIGS            | CD300LG FAM215A HPP2 PPY RP11-527L4.2 RP11-527L4.5 RP11-527L4.6 C17orf105 DUSP3 MPP3 RPS-905N1.2 SOST | 2.002e-07 9.879e-09 | 6.7 8.01         |
| 17  | 45                  | rs6504872 rs6504872   | LDL TOTAL_CHOLESTROL | CTD-2026D20.2 EFCAB13 ITGB3 RP11-290H9.4                                                              | 3.479e-13 6.987e-12 | 12.46 11.16      |
| 17  | 64                  | rs1801689             | LDL                  | APOH CEP112 PSMD7P1                                                                                   | 9.809e-12           | 11.01            |
| 17  | 65                  | rs12602912            | TRIGS                | AC006534.2 BPTF                                                                                       | 1.291e-07           | 6.89             |
| 17  | 66                  | rs4148005             | HDL                  | ABCA8                                                                                                 | 5.743e-14           | 13.24            |
| 17  | 67                  | rs2886232 rs2886232   | LDL TOTAL_CHOLESTROL | ABCA10 ABCA6                                                                                          | 3.876e-11 3.874e-08 | 10.41 7.41       |
| 17  | 76                  | rs4969178             | HDL                  | AC061992.1 AC061992.2 DNAH17 PGS1 RN75L236P RP11-806H10.4 SNORA30 SOCS3                               | 1.532e-12           | 11.81            |

**Supplementary Table 20: PheGWAS findings showcasing Chromosome Number, Marker Name, Associated Traits, Genes and the respective p-values for Chromosome 18**

| Chr | Position group (Mb) | Marker Name         | Associated Traits    | Genes                                                                                                               | P-Values            | -log10 (P-value) |
|-----|---------------------|---------------------|----------------------|---------------------------------------------------------------------------------------------------------------------|---------------------|------------------|
| 18  | 46                  | rs2156498           | HDL                  | C18orf32 DYM MIR1539 RP11-110H1.1 RP11-110H1.4 RP11-110H1.9 RPL17 RPL17-C18orf32 SNORD58A SNORD58B SNORD58C SRP72P1 | 2.175e-07           | 6.66             |
| 18  | 47                  | rs4939883 rs2156552 | HDL TOTAL_CHOLESTROL | LIPG RP11-813F20.1                                                                                                  | 1.796e-66 1.247e-31 | 65.75 30.9       |
| 18  | 57                  | rs6567160           | HDL                  | RNU4-17P RP11-795H16.2 RP11-795H16.3 RPS3AP49                                                                       | 2.918e-09           | 8.53             |

**Supplementary Table 21: PheGWAS findings showcasing Chromosome Number, Marker Name, Associated Traits, Genes and the respective p-values for Chromosome 19**

| Chr | Position group (Mb) | Marker Name                         | Associated Traits             | Genes                                                                                                                                                                     | P-Values                       | -log10 (P-value)          |
|-----|---------------------|-------------------------------------|-------------------------------|---------------------------------------------------------------------------------------------------------------------------------------------------------------------------|--------------------------------|---------------------------|
| 19  | 7                   | rs4804833 rs7248104                 | HDL TRIGS                     | AC010336.1 CTD-3193013.1 CTD-3193013.10 CTD-3193013.11 CTD-3193013.13 CTD-3193013.8 CTD-3193013.9 CTXN1 EVISL LRRCE MAP2K7 RN7SL115P RNA5SP463 SNAPC2 TGFBR3L TIMM44 INSR | 9.891e-08 5.045e-10            | 7 9.3                     |
| 19  | 8                   | rs2278236 rs4804311                 | HDL TRIGS                     | AC010323.1 ANGPTL4 CTD-2550D8.7 KANK3 MARCH2 MIR4999 NDUPA7 RAB11B RAB11B-AS1 RPS28 AC092316.1 AC092316.2 AC130469.2 ADMTS10 MYO1F PRAM1 ZNF414                           | 3.185e-18 1.485e-09            | 17.5 8.83                 |
| 19  | 10                  | rs11881156 rs11881156               | LDL TOTALCHOLESTROL           | AC007229.3 C19orf38 CARM1 DNM2 MIR199A1 TMED1                                                                                                                             | 1.701e-55 8.708e-44            | 54.77 43.06               |
| 19  | 11                  | rs737337 rs6511720 rs6511720        | HDL LDL TOTALCHOLESTROL       | C19orf80 CTC-510F12.2 DOCK6 KANK2 RN75L298P LDLR SMARCA4 SPC24                                                                                                            | 4.564e-17 3.85e-262 5.43e-202  | 16.34 261.42 201.26       |
| 19  | 18                  | rs4808802                           | TOTALCHOLESTROL               | AC010335.1 CTD-3137H5.1 ELL ISYNA1 SSBP4                                                                                                                                  | 3.266e-08                      | 7.49                      |
| 19  | 19                  | rs10401969 rs10401969 rs10401969    | LDL TRIGS TOTALCHOLESTROL     | AC138430.4 HAPLN4 MAU2 NCAN SUGP1 TM6SF2                                                                                                                                  | 2.654e-54 9.702e-70 4.126e-77  | 53.58 69.01 76.38         |
| 19  | 33                  | rs731839 rs731839                   | HDL TRIGS                     | AKR1B1P7 CEBPG PEPD                                                                                                                                                       | 3.441e-09 2.651e-09            | 8.46 8.58                 |
| 19  | 35                  | rs1688030                           | TRIGS                         | AC020907.1 CTD-2527I21.14 CTD-2527I21.9 FXD3 GRAMD1A HPN HPN-AS1 SCN1B                                                                                                    | 1.99e-07                       | 6.7                       |
| 19  | 44                  | rs926054 rs926054                   | LDL TOTALCHOLESTROL           | AC069278.4 CTC-5121J2.4 CTC-5121J2.6 ZNF180 ZNF229 ZNF285 ZNF285B                                                                                                         | 3.358e-15 2.407e-08            | 14.47 7.62                |
| 19  | 45                  | rs2075650 rs2254892 rs439401 rs7412 | HDL LDL TRIGS TOTALCHOLESTROL | APOC1 APOC1P1 APOC4 APOC4-APOC2 APOE CTB-129P6.4 PVRL2 TOMM40 APOC2 CLPTM1 CTB-129P6.11                                                                                   | 9.716e-26 0.1423e-66 1.56e-283 | 25.01 329.32 65.85 282.81 |
| 19  | 46                  | rs7255743 rs7255743                 | LDL TOTALCHOLESTROL           | ERCC1 FOSS OPA3 PPM1N RTN2 VASP                                                                                                                                           | 1.408e-25 9.61e-13             | 24.85 12.02               |
| 19  | 49                  | rs492602 rs516246                   | LDL TOTALCHOLESTROL           | FUT1 FUT2 IZUMO1 MAMSTR NTN5 RASIP1 RN75L345P SEC1P                                                                                                                       | 9.422e-14 9.133e-17            | 13.03 16.04               |
| 19  | 50                  | rs1132990                           | TRIGS                         | CTD-3148I10.13 CTD-3148I10.15 CTD-3148I10.9 FCGRT FLT3LG MIR150 NOSIP RCN3 RPL13A RPS11 SNORD32A SNORD33 SNORD34 SNORD35A SNORD35B Y_RNA hsa-mir-150                      | 6.125e-08                      | 7.21                      |
| 19  | 52                  | rs17695224                          | HDL                           | AC006272.1 AC006272.2 FPR1 FPR3 ZNF577                                                                                                                                    | 2.417e-13                      | 12.62                     |
| 19  | 54                  | rs103294 rs103294                   | HDL TOTALCHOLESTROL           | AC008984.2 AC008984.5 AC008984.6 AC008984.7 AC010492.4 AC010492.5 AC010518.3 AC098789.1 CTD-2337J16.1 LILRA3 LILRA4 LILRA5 LILRB2 LILRB5 MIR4752 RNU6-1307P RPS9 VN1R104P | 3.995e-30 2.27e-11             | 29.4 10.64                |

**Supplementary Table 22:** PheGWAS findings showcasing Chromosome Number, Marker Name, Associated Traits, Genes and the respective p-values for Chromosome 20

| Chr | Position group (Mb) | Marker Name                   | Associated Traits          | Genes                                                                                   | P-Values                      | -log10 (P-value) |
|-----|---------------------|-------------------------------|----------------------------|-----------------------------------------------------------------------------------------|-------------------------------|------------------|
| 20  | 12                  | rs364585                      | LDL                        | RP11-157E14.1 RP5-1069C8.2 RP5-1069C8.3 SPTLC3                                          | 4.278e-10                     | 9.37             |
| 20  | 17                  | rs2328223                     | LDL                        | AL035045.1 RNU6-192P RP5-905G11.3                                                       | 5.632e-09                     | 8.25             |
| 20  | 33                  | rs6058202                     | HDL                        | AL121753.1 EDEM2 MMP24 MMP24-AS1 MT1P3 PROCR RNA5SP483 RP4-61404.12                     | 1.275e-07                     | 6.89             |
| 20  | 34                  | rs7264396 rs7264396           | LDL TOTAL_CHOLESTROL       | C20orf173 ERGIC3 FER1L4 RP3-477O4.16 RP3-477O4.5 RPL36P4 RPL37P1 SPAG4                  | 4.412e-08 6.585e-13           | 7.36 12.18       |
| 20  | 39                  | rs6065311 rs6029143 rs2235367 | LDL TRIGS TOTAL_CHOLESTROL | PLCG1 RP1-1J6.2 TOP1 RP3-511B24.5 RP3-511B24.6 RPL23AP81 ZHX3                           | 1.656e-30 4.933e-08 7.219e-25 | 29.78 7.31 24.14 |
| 20  | 40                  | rs4142393 rs4142393           | LDL TOTAL_CHOLESTROL       | CHD6 RP4-620E11.4                                                                       | 1.347e-09 2.743e-07           | 8.87 6.56        |
| 20  | 43                  | rs1800961 rs1800961 rs1800961 | HDL LDL TOTAL_CHOLESTROL   | AL132772.1 C20orf62 HNF4A MIR3646 RP5-1013A22.2 RP5-1013A22.5 RP5-881L22.4 RP5-881L22.6 | 1.639e-34 6.034e-10 1.342e-24 | 33.79 9.22 23.87 |
| 20  | 44                  | rs4465830 rs4810479           | HDL TRIGS                  | FTLP1 PCIF1 PLTP ZNF335 CTSA NEURL2 RP3-337O18.9 SPATA25 ZSWIM1 ZSWIM3                  | 5.175e-40 2.067e-34           | 39.29 33.68      |
| 20  | 45                  | rs6066141                     | TRIGS                      | EYA2 GAPDHP54                                                                           | 2.339e-08                     | 7.63             |

**Supplementary Table 23:** PheGWAS findings showcasing Chromosome Number, Marker Name, Associated Traits, Genes and the respective p-values for Chromosome 22

| Chr | Position group (Mb) | Marker Name             | Associated Traits    | Genes                                                   | P-Values            | -log10 (P-value) |
|-----|---------------------|-------------------------|----------------------|---------------------------------------------------------|---------------------|------------------|
| 22  | 21                  | rs113359481 rs111562164 | HDL TOTAL_CHOLESTROL | RIMBP3C RN7SKP221 SCARNA17 SCARNA18 UBE2L3 CCDC116 YDJC | 4.303e-18 4.363e-10 | 17.37 9.36       |
| 22  | 30                  | rs5763662 rs5763662     | LDL TOTAL_CHOLESTROL | AC003681.1 CTA-8SE5.10 MTMR3                            | 1.191e-08 7.719e-08 | 7.92 7.11        |
| 22  | 35                  | rs138777                | TOTAL_CHOLESTROL     | HMGXB4 MIR3909 RP3-510H16.3 TOM1                        | 4.74e-08            | 7.32             |
| 22  | 38                  | rs3761445               | TRIGS                | AL021977.1 MAFF PLA2G6 RN7SL704P RP1-506.5 TMEM164B     | 8.062e-12           | 11.09            |
| 22  | 46                  | rs4253776 rs4253772     | LDL TOTAL_CHOLESTROL | CDPF1 PKDREJ PPARA TTC38                                | 3.353e-08 9.852e-09 | 7.47 8.01        |

## FIGURES:

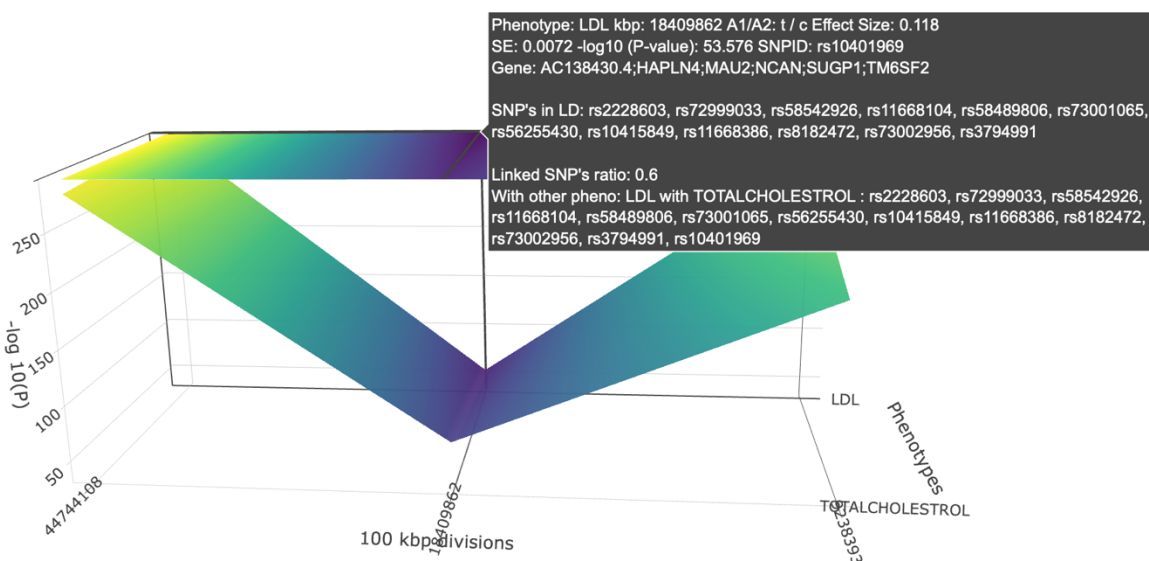

Fig 1: PheGWAS diagram for chromosome 19 on Total Cholesterol and LDL.

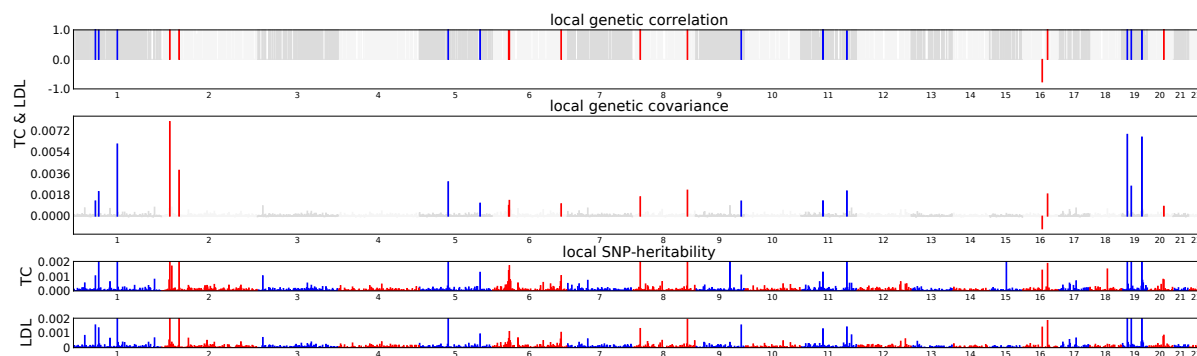

Fig 2: Estimates of Local Genetic Covariance for the Pairs of Traits LDL & TC using  $p$ -HESS. In 19<sup>th</sup> chromosome it shows 3 peaks for local genetic correlation.

**Section 1: Colocalization analysis performed for chromosome 19 for BP region from 44744108 to 46102697.**

### Section 1a: Using HyPrColoc

For each iteration of the algorithm, HyPrColoc returns:

- i. a cluster of putatively colocalized traits
- ii. the posterior probability that these traits are colocalized
- iii. the 'regional association' probability\* (which is always  $>$  the posterior probability)
- iv. a candidate causal variant explaining the shared association
- v. the proportion of the posterior probability explained by this variant (which represents the HyPrColoc multi-trait fine-mapping probability).

Following is the output:

```
Call:
hyprcoloc

Results:
  iteration      traits posterior_prob regional_prob candidate_snp posterior_explained_by_snp dropped_trait
1         1 LDL_beta, TOTALCHOLESTROL_beta              1              1          rs7412              1          <NA>
2         2              None                    NA              1          <NA>              NA          HDL_beta
```

## Section 1b: Using MOLOC

The output is a list with three elements:

1. First element is a data frame containing the priors, likelihoods and Posteriors for each locus and each combination. We usually care about the last columns, the posterior probability of a shared variant for each model;
2. Second element is the number of SNPs analyzed, in common across all datasets;
3. Third element of the output is a data frame with the posterior probability of the most likely SNP.

Following is the output.

```
> print(moloc[[1]])
  prior sumbf logBF_locus PPA
a      1e-04    47         43 0.0e+00
a,b    1e-08  1746        1737 0.0e+00
a,c    1e-08    799         789 0.0e+00
a,d    1e-08    136         126 0.0e+00
a,bc   1e-09  2499        2489 3.3e-38
a,bd   1e-09  1815        1805 0.0e+00
a,cd   1e-09    867         857 0.0e+00
a,bcd  1e-10  2568        2558 1.5e-09
a,b,c  1e-12  2498        2488 8.4e-42
a,b,d  1e-12  1835        1826 0.0e+00
a,b,cd 1e-13  2566        2556 3.9e-13
a,c,d  1e-12    888         878 0.0e+00
a,bd,c 1e-13  2565        2555 7.8e-14
a,bc,d 1e-13  2588        2579 1.7e-03
a,b,c,d 1e-16 2588        2578 1.2e-06
b      1e-04  1700        1695 0.0e+00
b,c    1e-08  2452        2442 6.2e-58
b,d    1e-08  1788        1778 0.0e+00
ac,b   1e-09  2498        2488 1.1e-38
ad,b   1e-09  1816        1806 0.0e+00
b,cd   1e-09  2520        2510 2.7e-29
acd,b  1e-10  2566        2557 5.1e-10
b,c,d  1e-12  2541        2531 2.9e-23
ad,b,c 1e-13  2568        2558 3.0e-12
ac,b,d 1e-13  2588        2578 7.6e-04
c      1e-04   753         748 0.0e+00
c,d    1e-08   841         831 0.0e+00
ab,c   1e-09  2499        2489 1.7e-38
ad,c   1e-09   869         859 0.0e+00
bd,c   1e-09  2520        2510 3.8e-29
abd,c  1e-10  2567        2557 1.1e-09
ab,c,d 1e-13  2587        2578 6.6e-04
d      1e-04    88         83 0.0e+00
ab,d   1e-09  1835        1825 0.0e+00
ac,d   1e-09   888         878 0.0e+00
bc,d   1e-09  2541        2531 4.2e-20
abc,d  1e-10  2588        2578 1.0e+00
ab     1e-05  1747        1742 0.0e+00
ab,cd  1e-10  2567        2557 1.1e-09
ac     1e-05   800         795 0.0e+00
ac,bd  1e-10  2567        2557 1.1e-09
ad     1e-05   117         112 0.0e+00
ad,bc  1e-10  2569        2559 5.6e-09
bc     1e-05  2453        2448 2.0e-54
bd     1e-05  1768        1763 0.0e+00
cd     1e-05   821         816 0.0e+00
abc    1e-06  2500        2495 4.8e-35
abd    1e-06  1815        1810 0.0e+00
acd    1e-06   868         863 0.0e+00
bcd    1e-06  2521        2516 1.1e-25
abcd   1e-07  2568        2563 3.0e-06
zero   1e+00    0          0 0.0e+00

> print(moloc[[2]])
[1] 137
> print(moloc[[3]])
  colocal_ppas best.snp.colocal
a      1.0e+00          rs7412
b      1.0e+00          rs7412
ab     1.0e+00          rs7412
c      1.0e+00          rs7412
ac     7.7e-04          rs7412
bc     1.0e+00          rs7412
abc    1.0e+00          rs7412
d      3.1e-06          rs7412
ad     3.0e-06          rs7412
bd     3.0e-06          rs7412
abd    3.0e-06          rs7412
cd     3.0e-06          rs7412
acd    3.0e-06          rs7412
bcd    3.0e-06          rs7412
abcd   3.0e-06          rs7412
```
